# Supplementary material for: A chromosome-level reference genome of the hazelnut, Corylus heterophylla Fisch
Source: PubMed Central journal article supplement (PMC8054262; doi:10.1093/gigascience/giab027), 2021-04-19

|                                                      |                                                                                                                                                                                                                                                                                                                                                                                                                                                                                                                                                                                                                                                                                                                                                                                                                                                                                                                                                                                                                                                                                                                                                                                                                                                                                                                                                                                                                                                                                                                                                                                                  |                |
|------------------------------------------------------|--------------------------------------------------------------------------------------------------------------------------------------------------------------------------------------------------------------------------------------------------------------------------------------------------------------------------------------------------------------------------------------------------------------------------------------------------------------------------------------------------------------------------------------------------------------------------------------------------------------------------------------------------------------------------------------------------------------------------------------------------------------------------------------------------------------------------------------------------------------------------------------------------------------------------------------------------------------------------------------------------------------------------------------------------------------------------------------------------------------------------------------------------------------------------------------------------------------------------------------------------------------------------------------------------------------------------------------------------------------------------------------------------------------------------------------------------------------------------------------------------------------------------------------------------------------------------------------------------|----------------|
| <b>Manuscript Number:</b>                            | GIGA-D-20-00312                                                                                                                                                                                                                                                                                                                                                                                                                                                                                                                                                                                                                                                                                                                                                                                                                                                                                                                                                                                                                                                                                                                                                                                                                                                                                                                                                                                                                                                                                                                                                                                  |                |
| <b>Full Title:</b>                                   | A chromosome-level reference genome of the hazelnut, <i>Corylus heterophylla</i> Fisch.                                                                                                                                                                                                                                                                                                                                                                                                                                                                                                                                                                                                                                                                                                                                                                                                                                                                                                                                                                                                                                                                                                                                                                                                                                                                                                                                                                                                                                                                                                          |                |
| <b>Article Type:</b>                                 | Data Note                                                                                                                                                                                                                                                                                                                                                                                                                                                                                                                                                                                                                                                                                                                                                                                                                                                                                                                                                                                                                                                                                                                                                                                                                                                                                                                                                                                                                                                                                                                                                                                        |                |
| <b>Funding Information:</b>                          | Special Investigation on Basic Resources of Science and Technology (2019FY100801_03)                                                                                                                                                                                                                                                                                                                                                                                                                                                                                                                                                                                                                                                                                                                                                                                                                                                                                                                                                                                                                                                                                                                                                                                                                                                                                                                                                                                                                                                                                                             | Not applicable |
|                                                      | Basic Scientific Research Business of Central Public Research Institutes of the Chinese Academy of Forestry, China (RIF-12 and CAFYBB2017ZA004-9)                                                                                                                                                                                                                                                                                                                                                                                                                                                                                                                                                                                                                                                                                                                                                                                                                                                                                                                                                                                                                                                                                                                                                                                                                                                                                                                                                                                                                                                | Not applicable |
| <b>Abstract:</b>                                     | <p><b>Background:</b> <i>Corylus heterophylla</i> Fisch. is a species of the Betulaceae family native to China and is an economically and ecologically nut tree that can withstand cold conditions. To deepen our knowledge of Betulaceae species and facilitate the use of <i>C. heterophylla</i> for breeding and its genetic improvement, we have sequenced the whole-genome of <i>C. heterophylla</i>.</p> <p><b>Findings:</b> Based on over 64.99 Gb (~175.31 x) of nanopore long reads, we assembled a 370.75 Mb <i>C. heterophylla</i> genome with contig N50 and scaffold N50 sizes of 2.01 Mb and 31.33Mb, respectively, accounting for 99.2 % of the estimated genome size. Furthermore, 361.8 Mb contigs were anchored to 11 chromosomes using Hi-C links data, representing 97.62% of the assembled genome sequences. Transcriptomes representing four different tissues were sequenced to assist protein-coding gene prediction. A total of 27,591 protein-coding genes were identified, of which 92.2% (25,389) were functionally annotated. The phylogenetic analysis showed that <i>C. heterophylla</i> is closed to <i>Ostrya japonica</i>, and diverged from their common ancestor approximately 52.79 million years ago.</p> <p><b>Conclusions:</b> We generated a high-quality chromosome-level genome of <i>C. heterophylla</i>. This genome resource should promote research on the molecular mechanism of hazelnut responding to environmental stress and serve as a resource for genome-assisted improvement in cold and drought resistance of <i>Corylus</i> genus.</p> |                |
| <b>Corresponding Author:</b>                         | Lujun Wang<br>Anhui Academy of Forestry<br>Hefei, CHINA                                                                                                                                                                                                                                                                                                                                                                                                                                                                                                                                                                                                                                                                                                                                                                                                                                                                                                                                                                                                                                                                                                                                                                                                                                                                                                                                                                                                                                                                                                                                          |                |
| <b>Corresponding Author Secondary Information:</b>   |                                                                                                                                                                                                                                                                                                                                                                                                                                                                                                                                                                                                                                                                                                                                                                                                                                                                                                                                                                                                                                                                                                                                                                                                                                                                                                                                                                                                                                                                                                                                                                                                  |                |
| <b>Corresponding Author's Institution:</b>           | Anhui Academy of Forestry                                                                                                                                                                                                                                                                                                                                                                                                                                                                                                                                                                                                                                                                                                                                                                                                                                                                                                                                                                                                                                                                                                                                                                                                                                                                                                                                                                                                                                                                                                                                                                        |                |
| <b>Corresponding Author's Secondary Institution:</b> |                                                                                                                                                                                                                                                                                                                                                                                                                                                                                                                                                                                                                                                                                                                                                                                                                                                                                                                                                                                                                                                                                                                                                                                                                                                                                                                                                                                                                                                                                                                                                                                                  |                |
| <b>First Author:</b>                                 | Tiantian Zhao                                                                                                                                                                                                                                                                                                                                                                                                                                                                                                                                                                                                                                                                                                                                                                                                                                                                                                                                                                                                                                                                                                                                                                                                                                                                                                                                                                                                                                                                                                                                                                                    |                |
| <b>First Author Secondary Information:</b>           |                                                                                                                                                                                                                                                                                                                                                                                                                                                                                                                                                                                                                                                                                                                                                                                                                                                                                                                                                                                                                                                                                                                                                                                                                                                                                                                                                                                                                                                                                                                                                                                                  |                |
| <b>Order of Authors:</b>                             | Tiantian Zhao                                                                                                                                                                                                                                                                                                                                                                                                                                                                                                                                                                                                                                                                                                                                                                                                                                                                                                                                                                                                                                                                                                                                                                                                                                                                                                                                                                                                                                                                                                                                                                                    |                |
|                                                      | Wenxu Ma                                                                                                                                                                                                                                                                                                                                                                                                                                                                                                                                                                                                                                                                                                                                                                                                                                                                                                                                                                                                                                                                                                                                                                                                                                                                                                                                                                                                                                                                                                                                                                                         |                |
|                                                      | Zhen Yang                                                                                                                                                                                                                                                                                                                                                                                                                                                                                                                                                                                                                                                                                                                                                                                                                                                                                                                                                                                                                                                                                                                                                                                                                                                                                                                                                                                                                                                                                                                                                                                        |                |
|                                                      | Lisong Liang                                                                                                                                                                                                                                                                                                                                                                                                                                                                                                                                                                                                                                                                                                                                                                                                                                                                                                                                                                                                                                                                                                                                                                                                                                                                                                                                                                                                                                                                                                                                                                                     |                |
|                                                      | Guixi Wang                                                                                                                                                                                                                                                                                                                                                                                                                                                                                                                                                                                                                                                                                                                                                                                                                                                                                                                                                                                                                                                                                                                                                                                                                                                                                                                                                                                                                                                                                                                                                                                       |                |
|                                                      | Qinghua Ma                                                                                                                                                                                                                                                                                                                                                                                                                                                                                                                                                                                                                                                                                                                                                                                                                                                                                                                                                                                                                                                                                                                                                                                                                                                                                                                                                                                                                                                                                                                                                                                       |                |
|                                                      | Lujun Wang                                                                                                                                                                                                                                                                                                                                                                                                                                                                                                                                                                                                                                                                                                                                                                                                                                                                                                                                                                                                                                                                                                                                                                                                                                                                                                                                                                                                                                                                                                                                                                                       |                |
| <b>Order of Authors Secondary Information:</b>       |                                                                                                                                                                                                                                                                                                                                                                                                                                                                                                                                                                                                                                                                                                                                                                                                                                                                                                                                                                                                                                                                                                                                                                                                                                                                                                                                                                                                                                                                                                                                                                                                  |                |

| Additional Information:                                                                                                                                                                                                                                                                                                                                                                                                                                                                                                             |          |
|-------------------------------------------------------------------------------------------------------------------------------------------------------------------------------------------------------------------------------------------------------------------------------------------------------------------------------------------------------------------------------------------------------------------------------------------------------------------------------------------------------------------------------------|----------|
| Question                                                                                                                                                                                                                                                                                                                                                                                                                                                                                                                            | Response |
| Are you submitting this manuscript to a special series or article collection?                                                                                                                                                                                                                                                                                                                                                                                                                                                       | No       |
| <p><b>Experimental design and statistics</b></p> <p>Full details of the experimental design and statistical methods used should be given in the Methods section, as detailed in our <a href="#">Minimum Standards Reporting Checklist</a>. Information essential to interpreting the data presented should be made available in the figure legends.</p> <p>Have you included all the information requested in your manuscript?</p>                                                                                                  | Yes      |
| <p><b>Resources</b></p> <p>A description of all resources used, including antibodies, cell lines, animals and software tools, with enough information to allow them to be uniquely identified, should be included in the Methods section. Authors are strongly encouraged to cite <a href="#">Research Resource Identifiers</a> (RRIDs) for antibodies, model organisms and tools, where possible.</p> <p>Have you included the information requested as detailed in our <a href="#">Minimum Standards Reporting Checklist</a>?</p> | Yes      |
| <p><b>Availability of data and materials</b></p> <p>All datasets and code on which the conclusions of the paper rely must be either included in your submission or deposited in <a href="#">publicly available repositories</a> (where available and ethically appropriate), referencing such data using a unique identifier in the references and in the “Availability of Data and Materials” section of your manuscript.</p>                                                                                                      | Yes      |

Have you have met the above requirement as detailed in our [Minimum Standards Reporting Checklist](#)?

1 A chromosome-level reference genome of the hazelnut, *Corylus heterophylla* Fisch.  
2 Tiantian Zhao<sup>1,3</sup>, Wenxu Ma<sup>1,3</sup>, Zhen Yang<sup>1,3</sup>, Lisong Liang<sup>1,3</sup>, Guixi Wang<sup>1,3</sup>, Qinghua Ma<sup>1,3\*</sup>,  
3 Lujun Wang<sup>2,3\*</sup>  
4 <sup>1</sup>Research Institute of Forestry, Chinese Academy of Forestry/Key Laboratory of Tree Breeding  
5 and Cultivation of the State Forestry and Grassland Administration, No.1 Dongxiaofu,  
6 Xiangshan Road, Haidian District, Beijing 100091, China; <sup>2</sup>Anhui Academy of Forestry, No.  
7 820 Changjiangxi Road, Shushan District, Hefei 230031, China; <sup>3</sup>National Hazelnut Industry  
8 Innovation Alliance/Hazelnut Engineering and Technical Research Center of the State Forestry  
9 and Grassland Administration, Xiangshan Road, Haidian District, Beijing 100091, China  
10 \*Correspondence address: Qinghua Ma, Research Institute of Forestry, Chinese Academy of Forestry, No.1  
11 Dongxiaofu, Xiangshan Road, Haidian District, Beijing 100091, China. E-mail: mqhmary@sina.com; Lujun  
12 Wang, Anhui Academy of Forestry, No. 820 Changjiangxi Road, Shushan District, Hefei 230031, China.  
13 E-mail: wanglujun1984@163.com

#### 14 **Abstract**

15 **Background:** *Corylus heterophylla* Fisch. is a species of the Betulaceae family native to China  
16 and is an economically and ecologically nut tree that can withstand cold conditions. To deepen  
17 our knowledge of Betulaceae species and facilitate the use of *C. heterophylla* for breeding and  
18 its genetic improvement, we have sequenced the whole-genome of *C. heterophylla*.

19 **Findings:** Based on over 64.99 Gb (~175.31 x) of nanopore long reads, we assembled a 370.75  
20 Mb *C. heterophylla* genome with contig N50 and scaffold N50 sizes of 2.01 Mb and 31.33 Mb,  
21 respectively, accounting for 99.2 % of the estimated genome size. Furthermore, 361.8 Mb  
22 contigs were anchored to 11 chromosomes using Hi-C links data, representing 97.62% of the  
23 assembled genome sequences. Transcriptomes representing four different tissues were  
24 sequenced to assist protein-coding gene prediction. A total of 27,591 protein-coding genes were  
25 identified, of which 92.2% (25,389) were functionally annotated. The phylogenetic analysis  
26 showed that *C. heterophylla* is closed to *Ostrya japonica*, and diverged from their common  
27 ancestor approximately 52.79 million years ago.

28 **Conclusions:** We generated a high-quality chromosome-level genome of *C. heterophylla*. This  
29 genome resource should promote research on the molecular mechanism of hazelnut responding

30 to environmental stress and serve as a resource for genome-assisted improvement in cold and  
31 drought resistance of *Corylus* genus.

## 32 **Background**

33 The *Corylus* genus, a member of the birch family Betulaceae and an important economically  
34 and ecologically nut tree species, is widely distributed throughout temperate regions of the  
35 Northern Hemisphere [1]. As an important nut crop, hazelnut provide the predominant flavor in  
36 a variety of cakes, candies, chocolate spreads, and butters. There are high content of unsaturated  
37 fatty acids and several essential vitamins in hazelnut oil.

38

39 The number of *Corylus* species recognized by the taxonomists ranged from 7 to 25, depending  
40 on different morphological and molecular classification [2, 3]. Among these, the European  
41 hazelnut, *Corylus avellana* L., is the species of most widely commercial cultivation with more  
42 than 400 cultivars have been described [4]. Commercial cultivation of *C. avellana* is limited to  
43 regions with climates moderated by large bodies of water that have cool summers, mild and  
44 humid winters, such as the slopes on the Black Sea of Turkey or the Willamette Valley of  
45 Oregon [5, 6]. Inadequate cold hardiness is a major factor limiting the expansion of commercial  
46 production into northern and inland areas. When *C. avellana* was introduced into China, it was  
47 observed that twigs withered and died almost every year in winter due to the cold, windy and  
48 dry climate in northern China. In southern China, however, the trees of European hazelnut  
49 seemed to grow well but actually bore few nuts, and abortive kernels were observed in high  
50 frequency.

51

52 Eight species and two botanical varieties of *Corylus* are reported to be native to China [5].  
53 Among the 1.67 billion ha of wild *Corylus* in China, *Corylus heterophylla* occupies 90% of the  
54 area, which is one of the most economically wild *Corylus* species [7]. Wild *Corylus*  
55 *heterophylla* is mainly distributed in the mountains from northern to northeastern China. The  
56 geographical distribution range is 36.78-51.73 (°N) and 100.57-132.20 (°E), where the main  
57 climate type belongs to temperate climate. Compared with *C. avellana*, *C. heterophylla* can be  
58 adapted to regions with low temperature (-30 to -40 °C) and drought conditions. Therefore, the  
59 characteristics of cold and drought resistance of *C. heterophylla* can be used as parent materials

60 for cross breeding with other hazel species.  
61 In the present study, to better understand the molecular mechanism of hazelnut response to  
62 environmental stress, we assembled a high quality genome of *C. heterophylla* using a  
63 combination of the Oxford Nanopore high-throughput sequencing technology and the  
64 high-throughput chromosome conformation capture (Hi-C) technique. Long reads were *de novo*  
65 assembled into 1,291 polished contigs with a total size of 370.75 Mb and contig N50 and  
66 scaffold N50 values of 2.01 Mb and 31.33 Mb, respectively, which is in line with genome sizes  
67 estimated using flow cytometry and the k-mer analysis. A total of 361.8 Mb contigs were  
68 anchored into 11 chromosomes, representing 97.62% of assembled genome. Our results provide  
69 the high-quality, chromosome-level genome assembly of the *C. heterophylla*, which will  
70 support breeding programs leading to genetic improvement of hazelnuts. Furthermore, it will  
71 facilitate understanding of the special position of *Corylus* and Betulaceae in plant evolution.

72

### 73 **Data Description**

#### 74 **Samples collection.**

75 Fresh and health leaves were collected from a single wild *C. heterophylla* tree in Yanqing,  
76 Beijing, China (N: 40° 32' 27"; E: 116° 03' 52"; Fig. 1). The fresh leaves tissue was flash frozen  
77 in liquid nitrogen for 30 min and then stored at -80 °C. DNA was extracted from leaf tissues  
78 following a previously published protocol [8]. Different tissues including root, stem, male  
79 inflorescence and leaf were sampled and flash frozen in liquid nitrogen for total RNA  
80 sequencing. Total RNA was extracted using the modified CTAB method [9].

81

#### 82 **Library preparation and whole genome sequencing.**

83 Genomic DNA library construction was isolated from leaf tissues using DNeasy Plant Mini Kit  
84 (Qiagen) according to the manufacturer's instructions. DNA concentrations and quality were  
85 measured using NanoDrop 2000 (Thermo) and Qbit Fluorometer (Thermo Fisher), respectively.  
86 The gDNA was sheared to ~500 bp fragments using an S2 Focused-Ultrasonicator (Covaris Inc.,  
87 MA, USA). Paired-end libraries (PE) were prepared using the TruSeq DNA PCR-Free Library  
88 Preparation Kit (Illumina, San Diego, CA, USA) according to the Illumina standard protocol.  
89 After quality control by Agilent 2100 Bioanalyzer and qPCR, all PCR-free libraries were

90 sequenced on an Illumina X-Ten platform (Illumina, San Diego, CA, USA) with 350 bp  
91 paired-end sequencing strategy according to the manufacturer's instruction. A total of 38.02 Gb  
92 (~101.76 fold coverage) clean reads were generated for genome survey and Nanopore genome  
93 polishing (Additional Table S1a).

94

#### 95 **Estimation of genome size and heterozygosity analysis.**

96 Before genome assembly, we estimated the *C. heterophylla* genome's size using Jellyfish [10]  
97 (<https://github.com/gmarcais/Jellyfish>) with an optimal k-mer size. A total of 38.02 Gb short  
98 reads (~102.55 x) were processed by Jellyfish to assess their k-mer distribution (k-mer value =  
99 19). Theoretically, the k-mer frequency follows a Poisson distribution. We selected k = 19 for  
100 the genome size estimation in this study. Genome sizes were calculated from the following  
101 equation: Genome size = 19-mer number / 19-mer depth, where 19-mer number is the total  
102 counts of each unique 19-mer and 19-mer depth is the highest frequency that occurred  
103 (Additional Fig. S1). The estimated genome size of *C. heterophylla* is 373.61 Mb.

104

#### 105 **Nanopore, RNA and Hi-C sequencing**

106 Genomic DNA was extracted and sequenced following the instructions of the Ligation  
107 Sequencing Kit (Nanopore, Oxfordshire, UK). DNA quality was assessed by agarose gel  
108 electrophoresis and NanoDrop 2000c spectrophotometry, followed by Thermo Fisher Scientific  
109 Qubit fluorometry. After quality control, genomic DNA was size-selected using Blue Pippin  
110 BLF7510 cassette (Sage Science, Beverly, MA, USA). Libraries (fragments > 20 kb) were  
111 prepared using Oxford Nanopore Technologies' standard Ligation Sequencing kit  
112 (SQK-LSK109) protocol and sequenced on the GridION X5 platform (Oxford Nanopore,  
113 Oxford, UK) with FLOMIN106 (R9.4) flow cells. Raw ONT reads (fastq) were extracted from  
114 base-called FAST5 files using poretools [11] (<https://github.com/arq5x/poretools>). Then, the  
115 short reads (<5 kb) and reads having low-quality bases and adapter sequences (YSFRI, 2019c)  
116 were removed. A total of 64.99 Gb (~175.31 fold coverage) nanopore long reads with a N50  
117 length of 27.17 kb were produced for genome assembly (Additional Fig. S2, Additional Tables  
118 S1b and S1c).

119 Different tissues including leaf, stem, root and male inflorescence were harvested and flash

120 frozen in liquid nitrogen for total RNA sequencing. The sample was subjected to poly(A)  
121 purification using oligo-dT beads (Life Technologies) followed by rRNA removal using  
122 Ribo-Zero Kit (Epicenter). The RNA quality was measured by 2100 RNA Nano 6000 Assay Kit  
123 (Agilent Technologies) and pooling together. The resulting RNA sample was used for cDNA  
124 libraries construction using the NEBNext Ultra RNA Library Prep Kit for Illumina (Neb). The  
125 quantified libraries were then prepared for sequencing on the Illumina HiSeq X-Ten system,  
126 producing 38.02 Gb paired-end reads (Additional Table S1d).

127 Hi-C experiments were performed essentially as described with some modifications [12, 13].  
128 Briefly, 2g freshly harvested leaves were cut into 2- to 3-mm pieces and infiltrated in 2%  
129 formaldehyde, and crosslinking was stopped by adding glycine. The tissue was ground to  
130 powder and suspended in nuclei isolation buffer to obtain a nuclei suspension. The procedure  
131 for the Hi-C experiment, including chromatin digestion, labelling of DNA ends, DNA ligation,  
132 purification and fragmentation, was as described previously [14]. The cross-linked DNA was  
133 digested with HindIII as previously described, marked by incubating with Klenow enzyme and  
134 biotin-14-dCTP overnight at 37 °C [14]. The 5' overhang of the fragments was repaired and  
135 labeled using biotinylated nucleotides, followed by ligation with T4 DNA polymerase. After  
136 reversal of crosslinking, ligated DNA was purified and sheared to 300-700 bp fragments using  
137 an S2 Focused-Ultrasonicator (Covaris Inc., MA, USA). The linked DNA fragments were  
138 enriched with streptavidin beads and prepared for Illumina HiSeq X-Ten sequencing, producing  
139 231.31 Mb (totaling of ~69.11 Gb) Hi-C links data (Additional Table S1e).

140

#### 141 **De novo genome assembly and pseudo-chromosome construction**

142 After the self-error correction using error correction model in Canu (version 1.5) [15], the  
143 Nanopore long reads were assembled into contigs using Wtdbg2 (version1.0) [16]. Two rounds  
144 of consensus correction were performed using Racon [17] (version 1.32) with corrected  
145 nanopore long reads, and the resulting assembly was further polished using Pilon (version 1.21)  
146 [18] with 38.02 Gb Illumina short reads (Additional Table S1a). The assembled length of 1,291  
147 contigs of *C. heterophylla* is 370.7 Mb, accounting for 99.2 % of the estimated genome size  
148 (373.61 Mb). The contig N50 and N90 were 2.11 Mb and 138.6 kb, respectively.

149 The pseudo-chromosomes were constructed using Hi-C links data. The clean Hi-C reads were



150 mapped to the consensus contigs using the Burrows-Wheeler Aligner[19] (BWA version 0.7.17),  
151 and only uniquely mapped read pairs were considered as high quality read pairs in Hi-C  
152 analysis. The reads were removed if the mapped positions in the reference genome are out of  
153 500 bp distance to the nearest restriction enzyme site. The quality assessment and normalization  
154 were performed using HiC-Pro[20]. There were 109,306,012 uniquely mapped PE reads, of  
155 which 58.33% (63,755,940) uniquely mapped reads were considered as valid interaction pairs  
156 for chromosome construction (Additional Table S2). The contigs were then clustered, ordered,  
157 and oriented into 11 pseudo-chromosomes using LACHESIS [20] (version 2e27abb). Finally,  
158 we obtained a high-quality chromosome-level reference genome with a total size of 370.75 Mb.  
159 The contig N50 and scaffold N50 values of were 2.01 Mb and 31.33 Mb, respectively (Table 1).  
160 A total of 361.8 Mb contigs were anchored into 11 chromosomes, representing 97.62% of  
161 assembled genome (Table 2).

162

### 163 **Genome quality assessment**

164 Genome completeness was assessed using the plants dataset of the Benchmarking Universal  
165 Single-Copy Orthologs (BUSCO) database (version 1.22) [21], with  $e$ -value  $< 1e^{-5}$ . It detected  
166 93.47% and 1.18%% of complete and partial gene models in *C. heterophylla* assembly results,  
167 respectively (Table 3). The core eukaryotic gene-mapping approach (CEGMA)[22] provides a  
168 method to rapidly assess genome completeness because it comprises a set of highly conserved,  
169 single-copy genes, present in all eukaryotes, containing 458 core eukaryotic genes (CEGs). We  
170 identified CEGs by CEGMA (version 2.3) pipeline [22] and found that 430 (93.89%) CEGs  
171 could be found in the assembly results (Additional Table S3a). The paired-end short libraries  
172 including 103,392,992 paired reads were remapped to the assembly genome with BWA mem[23]  
173 to assess the completeness of assembly results. More than 98.47 % of these reads could be  
174 accurately mapped into genome sequences (Additional Table S3b). Additionally, the heatmap of  
175 Hi-C interaction frequency was selected to visually assess the assembled accuracy of the *C.*  
176 *heterophylla* genome. The interaction heatmap was showed at 100 kb resolution. LG01-LG11  
177 represent the eleven chromosomes of *C. heterophylla* genome, which ordered as the  
178 chromosome length. The horizontal and vertical coordinates represent the order of each ‘bin’ on  
179 the corresponding chromosome. The signal intensities clearly divided the ‘bins’ into eleven

180 distinct groups (LG01-LG11), demonstrating the high quality of the chromosome assignment  
181 (Fig. 2). These observations suggested the high quality and completeness of chromosome-level  
182 reference genome for *C. heterophylla*.

183

#### 184 **Repetitive elements and Protein-coding gene annotation**

185 Repetitive elements in the *C. heterophylla* genome were identified using a combined strategy  
186 of *de novo* and homology-based approaches at the DNA and protein levels. Tandem repeats  
187 were annotated using Tandem Repeat Finder (TRF). A repeat library was constructed using  
188 MITE-Hunter [24] , LTR-FINDER (version 1.05) [25], RepeatScout (version 1.0.5) [26] and  
189 PILER [27] for *de novo* repeat content annotation. The *de novo* repeat library was classified  
190 through PASTEClassifier (version 1.0) package [28] with default parameter, and then integrated  
191 with Repbase (19.06) [29] to build a new repeat library. Finally, RepeatMasker (version 4.0.6)  
192 [30] with parameters of “-nolow -no\_is -norna -engine wublast”) was selected to identify and  
193 classify the genomic repetitive elements of *C. heterophylla*. In total, 210.26 Mb repetitive  
194 sequences were identified, accounting for 56.71% of *C. heterophylla* genome sequences (Table  
195 3). The top three classed of repetitive elements were ClassI/LARD, ClassI/LTR/Gypsy and  
196 ClassI/LTR/Copia, occupying 20.51%, 11.14% and 10.44% of assembled genome sequences,  
197 respectively (Table 3).

198 Gene annotation was performed using a combination of ab initio prediction, homology-based  
199 gene prediction, and transcript evidence from RNA-seq data The *de novo* approach was  
200 implemented using Augustus (version 2.4) [31], Geneid [32], GlimmerHMM [33], Genscan [34]  
201 and SNAP [35]. For homology-based prediction, TBLASTN v2.2.31 [36] was used to align  
202 predicted protein sequences of *Arabidopsis thaliana*, *Betula pendula*, *Juglans regia* and *Ostrya*  
203 *chinensis* to the *C. heterophylla* genome with an E-value threshold of 1E-05. Then, GeMoMa  
204 (version 1.3.1) [37] was employed for homology-based gene prediction. The transcriptome data  
205 from pooled tissues of leaf, stem, root, male inflorescence of *C. heterophylla* were assembled  
206 into unigenes using Hisat (version 2.0.4) [38] and Stringtie (version 1.2.3) [39]. Then unigenes  
207 were used to predict gene structures using TransDecoder (version 2.0,  
208 <http://transdecoder.github.io>) [40], GeneMarkS-T (version 5.1) [41], PASA (version 2.0.2) [41].  
209 Finally, the gene models obtained from above three approaches were integrated into a consensus

210 gene set using EVidenceModeler (version 1.1.0) [42] with default parameters. PASA (version  
211 2.0.2) [43] was then used to annotate the gene structures including UTRs and alternative-splice  
212 sites (Additional Fig. S3, Additional Table S4a). A total of 27,591 non-redundant protein-coding  
213 genes were predicted for *C. heterophylla* genome (Table 1). Gene models were annotated by  
214 homologous searching against several databases using BLASTP from BLAST+ package [36]  
215 (E-value = 1e-5), including NR [44], KOG [45], TrEMBL [46] and KEGG [47]  
216 (<http://www.genome.jp/kegg/>) databases. InterProScan (version 4.3) [48] was used to annotated  
217 the protein motifs and domains. Blast2GO [49, 50] pipeline was used to obtain GO terms  
218 annotation from the NCBI NR database. In total, 25,389 protein coding genes (92.2%) were  
219 successfully assigned into corresponding functions (Additional Table S4b).

220 Whole genome-wide pseudogene identification was carried out for *C. heterophylla*. Only  
221 candidate pseudogene containing frame shifts and/or premature stop codons in its coding region  
222 were considered as a reliable pseudogene. Proteins of *C. heterophylla* were aligned to the  
223 reference genome using GenBlastA (version 1.0.4) [51] to detect the candidate homologue  
224 region. Then the candidate pseudogenes were identified using GeneWise (version 2.4.1) [52].  
225 Finally, 2,988 pseudogenes were identified in *C. heterophylla* genome sequences (Table 1).

226 Different types of non-coding RNA in the *C. heterophylla* genome were identified and classified  
227 as family and subfamily. The tRNAscan-SE [53] (version 1.23) was applied to detect tRNAs.  
228 The miRNA were identified by homolog searching miRBase (Release 21) [54] against *C.*  
229 *heterophylla* genome with 1 mismatch. Then second structures of the putative sequences were  
230 further predicted by miRDeep2 [55]. Finally, putative miRNAs with hairpin structure were  
231 considered as reliable ones. Other types of non-coding RNA were detected using Infernal [56]  
232 (e value  $\leq 0.01$ ) based on Rfam database (release 12.0) [57]. In total, 92 miRNAs: microRNAs,  
233 617 tRNAs: transfer RNAs and 622 rRNA: ribosome RNA were annotated in *C. heterophylla*  
234 genome sequences (Additional Table S4c).

235

### 236 **Gene family identification and phylogenetic tree construction**

237 In the gene family and phylogenetic analysis, the protein-coding genes of *Oryza sativa*,  
238 *Arabidopsis thaliana*, *Populus trichocarpa*, *Quercus variabilis*, *Juglans regia*, *Betula pendula*,  
239 *Ostrya japonica* and *C. heterophylla* were downloaded from Genebank or Ensembl database.

240 The longest transcript was selected to represent the protein-coding gene. Protein sequences  
241 clustering was performed using OrthoMCL v2.0.9 [58] with default parameters to identify the  
242 gene families. The result shows that *C. heterophylla* has totaling of 16,811 gene families,  
243 including 5,150 single copy genes, 6,040 multiple copies genes and 582 specific genes. Notably,  
244 222 species-specific families were identified for *C. heterophylla*, which may contribute to its  
245 unique features (Fig. 3A). To construct the phylogenetic analysis, 1,182 single copy orthologs  
246 were identified from one copy families of selected species. The protein sequences of  
247 single-copy orthologs were aligned by MUSCLE v3.8.31 [59], and removed low quality  
248 alignment region by Gblocks v0.91b [60] with default parameter. A phylogenetic tree was  
249 constructed with the maximum-likelihood method with the JTT amino acid substitution model  
250 implemented in the PhyML v3.3 package [61]. The divergence time was estimated using the  
251 MCMCtree program in PAML v4.7b (Phylogenetic Analysis of ML) package [62]. We used an  
252 age of (51.2 - 66.7 Mya) to calibrate the crown nodes of family Betulaceae [63]. The calibrated  
253 time (152 - 160 Mya) of *O. sativa* vs *P. trichocarpa* getting from TimeTree database was also  
254 used for divergence time estimation [64]. The result shows that *C. heterophylla* is closed to *O.*  
255 *japonica*, and diverged from their common ancestor at ~52.79 million years (Fig. 3B).

256

## 257 **Conclusion**

258 To our knowledge, this is the first report of the chromosome-level genome assembly of *C.*  
259 *heterophylla* using the third-generation sequencing technology of Nanopore and Hi-C. It has  
260 210.26 Mb repetitive sequences, accounting for 56.71% of genome sequences. A total of  
261 27,591 high-quality protein-coding genes were annotated by integrating evidences of de novo  
262 prediction, homologous protein prediction and transcriptome data. Phylogenetic analysis  
263 showed that *Corylus* is closely related to *Ostrya* and diverged from their common ancestor at  
264 approximate 52.79 Mya. This work provides valuable chromosome-level genomic data for  
265 studying loquat traits. The genomic data should promote research on the molecular mechanism  
266 of hazelnut response to environmental stress and provides valuable resource for  
267 genome-assisted improvement in *Corylus* breeding.

268

## 269 **Additional Files**

270 Additional Figure S1: Genome survey analysis of *C. heterophylla* based on k-mer = 19.  
271 Additional Figure S2: Fragment size distribution of Hi-C read pairs.  
272 Additional Figure S3: Venn plot of predicted genes generated from ab initio, RNAseq and  
273 homology methods.  
274 Additional Table S1a: Summary of illumina data for genome survey and genome polishing.  
275 Additional Table S1b: Statistic of Nanopore long reads.  
276 Additional Table S1c: Distribution of length of Nanopore long reads.  
277 Additional Table S1d: Summary of pooled transcriptome data used for gene prediction.  
278 Additional Table S1e: Summary of Hi-C data for error correction and chromosome  
279 construction.  
280 Additional Table S2: Valid interaction pairs of Hi-C sequencing data.  
281 Additional Table S3a: Completeness analysis based on CEG database.  
282 Additional Table S3b: Genome completeness assessment based on illumina sequencing reads.  
283 Additional Table S4a: Summary of gene prediction resulted from different evidences.  
284 Additional Table S4b: Gene function annotated by different databases.  
285 Additional Table S4c: Non-coding RNA identification.

286

## 287 **Abbreviations**

288 BLAST: Basic Local Alignment Search Tool; bp: base pairs; BUSCO: Benchmarking Universal  
289 Single-Copy Orthologs; BWA: Burrows-Wheeler Aligner; CEGMA: Core Eukaryotic Genes  
290 Mapping Approach; CTAB: Hexadecyltrimethyl Ammonium Bromide; Gb: gigabase pairs;  
291 GeMoMa: Gene Model Mapper; GO: Gene Ontology; Hi-C: highthroughput chromosome  
292 conformation capture; HiSeq: highthroughput sequencing; HMM: hidden Markov model; kb:  
293 kilobase pairs; KEGG: Kyoto Encyclopedia of Genes and Genomes; KOG: EuKaryotic  
294 Orthologous Groups; LG: linkage group; LTR: long terminal repeat; Mb: megabase pairs;  
295 miRNA: microRNA; MITE: miniature inverted-repeat transposable element; MUSCLE:  
296 MUltiple Sequence Comparison by Log-Expectation; Mya: million years ago; NCBI: National  
297 Center for Biotechnology Information; NR: non-redundant; PAML: Phylogenetic Analysis of  
298 Maximum-Likelihood; PASA: Program to Assemble Spliced Alignments; PCR: polymerase  
299 chain reaction; PE: paired-end; PhyML: Phylogeny Maximum Likelihood; RNA-seq: RNA

300 sequencing; rRNA: ribosomal RNA; SAAS: Shanghai Academy of Agricultural Sciences;  
301 SNAP: Semi-HMM-based Nucleic Acid Parser; TIR: terminal inverted repeat; TrEMBL: a  
302 database of translated proteins from European Bioinformatics Institute; TRF: Tandem Repeat  
303 Finder; tRNA: transfer RNA.

304

### 305 **Competing Interests**

306 The authors declare that they have no competing interests.

307

### 308 **Funding**

309 This work was financed by the Special Investigation on Basic Resources of Science and  
310 Technology (Grant No. 2019FY100801\_03) and the Special Fund for Basic Scientific Research  
311 Business of Central Public Research Institutes of the Chinese Academy of Forestry, China  
312 (Grant No. RIF-12 and CAFYBB2017ZA004-9).

313

### 314 **Authors' Contributions**

315 T.Z., Z.Y., W.M., Q.M., and L.W. designed and conceived the study; W.M., L.L., and G.X.  
316 helped to collect the samples; T.Z., Z.Y., L.L., Q.M., and L.W. performed the experiments; T.Z.,  
317 W.M., Z.Y., Q.M., and L.W. wrote and revised the manuscript. All authors read and approved  
318 the manuscript.

319

### 320 **Availability of supporting data**

321 The genome sequence data has been deposited in NCBI under the accession xx. The version  
322 described in this paper is version xx. Raw reads of Nanopore, WGS, Hi-C and RNAseq, and  
323 genome assembly sequences of the *C. heterophylla* genome have been deposited at the Genome  
324 Sequence Archive in NCBI under BioProject PRJNA655406 and BioSample Accessions of  
325 SAMN15734705 and SAMN15734794. All supplementary figures and tables are provided in  
326 Additional Files. Supporting data including annotations and RNA-seq data and phylogenetic  
327 trees are available in the GigaDB database (ref).

328

### 329 **Acknowledgements**

330 We thank Changmian Ji from Chinese Academy of Tropical Agricultural Sciences for assistant  
331 of bioinformatic analysis and discussion.

332

### 333 **References**

- 334 1. Zong JW, Zhao TT, Ma QH, Liang LS and Wang GX. Assessment of Genetic Diversity and Population  
335 Genetic Structure of *Corylus mandshurica* in China Using SSR Markers. *PLoS One*. 2015;10 9:e0137528.  
336 doi:10.1371/journal.pone.0137528.
- 337 2. Mehlenbacher SA. Hazelnuts. A guide to nut tree culture in north america. Northern Nut Growers  
338 Association, Inc; 2003.
- 339 3. Boccacci P, Beltramo C, Sandoval Prando MA, Lembo A, Sartor C, Mehlenbacher SA, et al. In silico mining,  
340 characterization and cross-species transferability of EST-SSR markers for European hazelnut (*Corylus*  
341 *avellana* L.). *Molecular Breeding*. 2015;35 1:21. doi:10.1007/s11032-015-0195-7.
- 342 4. Gürcan K, Mehlenbacher S, Botta R and Boccacci P. Development, characterization, segregation, and  
343 mapping of microsatellite markers for European hazelnut (*Corylus avellana* L.) from enriched genomic  
344 libraries and usefulness in genetic diversity studies. *Tree Genetics & Genomes*. 2010;6 4:513-31.
- 345 5. ZHANG Yuhe LL, LIANG Weijian,ZHANG Yuming. China fruit's monograph-chestnut and hazelnut.  
346 Beijing:China Forestry Publishing House; 2005.
- 347 6. Molnar TJ. *Corylus*. Wild Crop Relatives: Genomic and Breeding Resources. 1 ed. Forest Trees:  
348 Springer-Verlag Berlin Heidelberg; 2011.
- 349 7. Wang GX, Ma QH, Zhao TT and Liang LS. Resources and production of hazelnut in China. *Acta*  
350 *horticulturae*. 2018; 1226:59-64.
- 351 8. Mayjonade B, Gouzy J, Donnadiou C, Pouilly N, Marande W, Callot C, et al. Extraction of  
352 high-molecular-weight genomic DNA for long-read sequencing of single molecules. *Biotechniques*.  
353 2016;61 4:203-5. doi:10.2144/000114460.
- 354 9. Doyle J. A rapid DNA isolation procedure for small quantities of fresh leaf tissue. *Phytochem Bull*.  
355 1987;19.
- 356 10. Marçais G and Kingsford C. A fast, lock-free approach for efficient parallel counting of occurrences of  
357 k-mers. *Bioinformatics*. 2011;27 6:764-70. doi:10.1093/bioinformatics/btr011.
- 358 11. Loman NJ and Quinlan AR. Poretools: a toolkit for analyzing nanopore sequence data. *Bioinformatics*.  
359 2014;30 23:3399-401. doi:10.1093/bioinformatics/btu555.
- 360 12. Belton JM, McCord RP, Gibcus JH, Naumova N, Zhan Y and Dekker J. Hi-C: a comprehensive technique to  
361 capture the conformation of genomes. *Methods*. 2012;58 3:268-76. doi:10.1016/j.ymeth.2012.05.001.
- 362 13. Grob S, Schmid MW and Grossniklaus U. Hi-C analysis in *Arabidopsis* identifies the KNOT, a structure  
363 with similarities to the flamenco locus of *Drosophila*. *Mol Cell*. 2014;55 5:678-93.  
364 doi:10.1016/j.molcel.2014.07.009.
- 365 14. Xie T, Zheng JF, Liu S, Peng C, Zhou YM, Yang QY, et al. De novo plant genome assembly based on  
366 chromatin interactions: a case study of *Arabidopsis thaliana*. *Mol Plant*. 2015;8 3:489-92.  
367 doi:10.1016/j.molp.2014.12.015.
- 368 15. Koren S, Walenz BP, Berlin K, Miller JR, Bergman NH and Phillippy AM. Canu: scalable and accurate  
369 long-read assembly via adaptive k-mer weighting and repeat separation. *Genome Res*. 2017;27 5:722-36.  
370 doi:10.1101/gr.215087.116.

- 371 16. Ruan J and Li H. Fast and accurate long-read assembly with wtdbg2. *Nat Methods*. 2020;17 2:155-8.  
372 doi:10.1038/s41592-019-0669-3.
- 373 17. Vaser R, Sović I, Nagarajan N and Šikić M. Fast and accurate de novo genome assembly from long  
374 uncorrected reads. *Genome Research*. 2017;27 5:737-46. doi:10.1101/gr.214270.116.
- 375 18. Walker BJ, Abeel T, Shea T, Priest M, Abouelliel A, Sakthikumar S, et al. Pilon: an integrated tool for  
376 comprehensive microbial variant detection and genome assembly improvement. *PLoS One*. 2014;9  
377 11:e112963. doi:10.1371/journal.pone.0112963.
- 378 19. Li H and Durbin R. Fast and accurate short read alignment with Burrows-Wheeler transform.  
379 *Bioinformatics*. 2009;25 14:1754-60. doi:10.1093/bioinformatics/btp324.
- 380 20. Burton JN, Adey A, Patwardhan RP, Qiu R, Kitzman JO and Shendure J. Chromosome-scale scaffolding of  
381 de novo genome assemblies based on chromatin interactions. *Nat Biotechnol*. 2013;31 12:1119-25.  
382 doi:10.1038/nbt.2727.
- 383 21. Seppey M, Manni M and Zdobnov EM. BUSCO: Assessing Genome Assembly and Annotation  
384 Completeness. *Methods Mol Biol*. 2019;1962:227-45. doi:10.1007/978-1-4939-9173-0\_14.
- 385 22. Parra G, Bradnam K and Korf I. CEGMA: a pipeline to accurately annotate core genes in eukaryotic  
386 genomes. *Bioinformatics*. 2007;23 9:1061-7. doi:10.1093/bioinformatics/btm071.
- 387 23. Li H and Durbin R. Fast and accurate long-read alignment with Burrows-Wheeler transform.  
388 *Bioinformatics*. 2010;26 5:589-95. doi:10.1093/bioinformatics/btp698.
- 389 24. Han Y and Wessler SR. MITE-Hunter: a program for discovering miniature inverted-repeat transposable  
390 elements from genomic sequences. *Nucleic Acids Res*. 2010;38 22:e199. doi:10.1093/nar/gkq862.
- 391 25. Xu Z and Wang H. LTR\_FINDER: an efficient tool for the prediction of full-length LTR retrotransposons.  
392 *Nucleic Acids Res*. 2007;35 Web Server issue:W265-8. doi:10.1093/nar/gkm286.
- 393 26. Price AL, Jones NC and Pevzner PA. De novo identification of repeat families in large genomes.  
394 *Bioinformatics*. 2005;21 Suppl 1:i351-8. doi:10.1093/bioinformatics/bti1018.
- 395 27. Edgar RC and Myers EW. PILER: identification and classification of genomic repeats. *Bioinformatics*.  
396 2005;21 Suppl 1:i152-8. doi:10.1093/bioinformatics/bti1003.
- 397 28. Hoede C, Arnoux S, Moisset M, Chaumier T, Inizan O, Jamilloux V, et al. PASTEC: an automatic  
398 transposable element classification tool. *PLoS One*. 2014;9 5:e91929.  
399 doi:10.1371/journal.pone.0091929.
- 400 29. Bao W, Kojima KK and Kohany O. Repbase Update, a database of repetitive elements in eukaryotic  
401 genomes. *Mob DNA*. 2015;6:11. doi:10.1186/s13100-015-0041-9.
- 402 30. Tarailo-Graovac M and Chen N. Using RepeatMasker to identify repetitive elements in genomic  
403 sequences. *Curr Protoc Bioinformatics*. 2009;Chapter 4:Unit 4.10. doi:10.1002/0471250953.bi0410s25.
- 404 31. Stanke M and Morgenstern B. AUGUSTUS: a web server for gene prediction in eukaryotes that allows  
405 user-defined constraints. *Nucleic Acids Res*. 2005;33 Web Server issue:W465-7. doi:10.1093/nar/gki458.
- 406 32. Alioto T, Blanco E, Parra G and Guigó R. Using geneid to Identify Genes. *Curr Protoc Bioinformatics*.  
407 2018;64 1:e56. doi:10.1002/cpbi.56.
- 408 33. Majoros WH, Pertea M and Salzberg SL. TigrScan and GlimmerHMM: two open source ab initio  
409 eukaryotic gene-finders. *Bioinformatics*. 2004;20 16:2878-9. doi:10.1093/bioinformatics/bth315.
- 410 34. Burge C and Karlin S. Prediction of complete gene structures in human genomic DNA. *J Mol Biol*.  
411 1997;268 1:78-94. doi:10.1006/jmbi.1997.0951.
- 412 35. Korf I. Gene finding in novel genomes. *BMC Bioinformatics*. 2004;5:59. doi:10.1186/1471-2105-5-59.
- 413 36. Camacho C, Coulouris G, Avagyan V, Ma N, Papadopoulos J, Bealer K, et al. BLAST+: architecture and  
414 applications. *BMC Bioinformatics*. 2009;10:421. doi:10.1186/1471-2105-10-421.



- 415 37. Keilwagen J, Wenk M, Erickson JL, Schattat MH, Grau J and Hartung F. Using intron position conservation  
416 for homology-based gene prediction. *Nucleic Acids Res.* 2016;44 9:e89. doi:10.1093/nar/gkw092.
- 417 38. Kim D, Langmead B and Salzberg SL. HISAT: a fast spliced aligner with low memory requirements. *Nat*  
418 *Methods.* 2015;12 4:357-60. doi:10.1038/nmeth.3317.
- 419 39. Pertea M, Pertea GM, Antonescu CM, Chang TC, Mendell JT and Salzberg SL. StringTie enables improved  
420 reconstruction of a transcriptome from RNA-seq reads. *Nat Biotechnol.* 2015;33 3:290-5.  
421 doi:10.1038/nbt.3122.
- 422 40. TransDecoder. <https://github.com/TransDecoder/TransDecoder>.
- 423 41. Tang S, Lomsadze A and Borodovsky M. Identification of protein coding regions in RNA transcripts.  
424 *Nucleic Acids Res.* 2015;43 12:e78. doi:10.1093/nar/gkv227.
- 425 42. Haas BJ, Salzberg SL, Zhu W, Pertea M, Allen JE, Orvis J, et al. Automated eukaryotic gene structure  
426 annotation using EVIDENCEModeler and the Program to Assemble Spliced Alignments. *Genome Biol.*  
427 2008;9 1:R7. doi:10.1186/gb-2008-9-1-r7.
- 428 43. Campbell MA, Haas BJ, Hamilton JP, Mount SM and Buell CR. Comprehensive analysis of alternative  
429 splicing in rice and comparative analyses with Arabidopsis. *BMC Genomics.* 2006;7:327.  
430 doi:10.1186/1471-2164-7-327.
- 431 44. Deng YY, Li JQ, Wu SF, Zhu YP and He FC. Integrated nr Database in Protein Annotation System and Its  
432 Localization. *Computer Engineering.* 2006;32 5:71-2.
- 433 45. Koonin EV, Fedorova ND, Jackson JD, Jacobs AR, Krylov DM, Makarova KS, et al. A comprehensive  
434 evolutionary classification of proteins encoded in complete eukaryotic genomes. *Genome Biol.* 2004;5  
435 2:R7. doi:10.1186/gb-2004-5-2-r7.
- 436 46. Boeckmann B, Bairoch A, Apweiler R, Blatter MC, Estreicher A, Gasteiger E, et al. The SWISS-PROT  
437 protein knowledgebase and its supplement TrEMBL in 2003. *Nucleic Acids Res.* 2003;31 1:365-70.  
438 doi:10.1093/nar/gkg095.
- 439 47. Kanehisa M, Furumichi M, Tanabe M, Sato Y and Morishima K. KEGG: new perspectives on genomes,  
440 pathways, diseases and drugs. *Nucleic Acids Res.* 2017;45 D1:D353-d61. doi:10.1093/nar/gkw1092.
- 441 48. Zdobnov EM and Apweiler R. InterProScan--an integration platform for the signature-recognition  
442 methods in InterPro. *Bioinformatics.* 2001;17 9:847-8. doi:10.1093/bioinformatics/17.9.847.
- 443 49. Conesa A and Götz S. Blast2GO: A comprehensive suite for functional analysis in plant genomics. *Int J*  
444 *Plant Genomics.* 2008;2008:619832. doi:10.1155/2008/619832.
- 445 50. Götz S, García-Gómez JM, Terol J, Williams TD, Nagaraj SH, Nueda MJ, et al. High-throughput functional  
446 annotation and data mining with the Blast2GO suite. *Nucleic Acids Res.* 2008;36 10:3420-35.  
447 doi:10.1093/nar/gkn176.
- 448 51. She R, Chu JS, Wang K, Pei J and Chen N. GenBlastA: enabling BLAST to identify homologous gene  
449 sequences. *Genome Res.* 2009;19 1:143-9. doi:10.1101/gr.082081.108.
- 450 52. Birney E and Durbin R. Using GeneWise in the Drosophila annotation experiment. *Genome Res.* 2000;10  
451 4:547-8. doi:10.1101/gr.10.4.547.
- 452 53. Lowe TM and Eddy SR. tRNAscan-SE: a program for improved detection of transfer RNA genes in  
453 genomic sequence. *Nucleic Acids Res.* 1997;25 5:955-64. doi:10.1093/nar/25.5.955.
- 454 54. Kozomara A, Birgaoanu M and Griffiths-Jones S. miRBase: from microRNA sequences to function. *Nucleic*  
455 *Acids Res.* 2019;47 D1:D155-d62. doi:10.1093/nar/gky1141.
- 456 55. Friedländer MR, Mackowiak SD, Li N, Chen W and Rajewsky N. miRDeep2 accurately identifies known  
457 and hundreds of novel microRNA genes in seven animal clades. *Nucleic Acids Res.* 2012;40 1:37-52.  
458 doi:10.1093/nar/gkr688.

- 459 56. Nawrocki EP and Eddy SR. Infernal 1.1: 100-fold faster RNA homology searches. *Bioinformatics*. 2013;29  
460 22:2933-5. doi:10.1093/bioinformatics/btt509.
- 461 57. Nawrocki EP, Burge SW, Bateman A, Daub J, Eberhardt RY, Eddy SR, et al. Rfam 12.0: updates to the RNA  
462 families database. *Nucleic Acids Res*. 2015;43 Database issue:D130-7. doi:10.1093/nar/gku1063.
- 463 58. Li L, Stoeckert CJ, Jr. and Roos DS. OrthoMCL: identification of ortholog groups for eukaryotic genomes.  
464 *Genome Res*. 2003;13 9:2178-89. doi:10.1101/gr.1224503.
- 465 59. Edgar RC. MUSCLE: multiple sequence alignment with high accuracy and high throughput. *Nucleic Acids*  
466 *Res*. 2004;32 5:1792-7. doi:10.1093/nar/gkh340.
- 467 60. Talavera G and Castresana J. Improvement of phylogenies after removing divergent and ambiguously  
468 aligned blocks from protein sequence alignments. *Syst Biol*. 2007;56 4:564-77.  
469 doi:10.1080/10635150701472164.
- 470 61. Guindon S, Dufayard JF, Lefort V, Anisimova M, Hordijk W and Gascuel O. New algorithms and methods  
471 to estimate maximum-likelihood phylogenies: assessing the performance of PhyML 3.0. *Syst Biol*.  
472 2010;59 3:307-21. doi:10.1093/sysbio/syq010.
- 473 62. Yang Z. PAML 4: phylogenetic analysis by maximum likelihood. *Mol Biol Evol*. 2007;24 8:1586-91.  
474 doi:10.1093/molbev/msm088.
- 475 63. Takhtajan AL. Outline of the classification of flowering plants (magnoliophyta). *Botanical Review*.  
476 1980;46 3:225-359.
- 477 64. TimeTree database. <http://www.timetree.org/>.

478

1

2

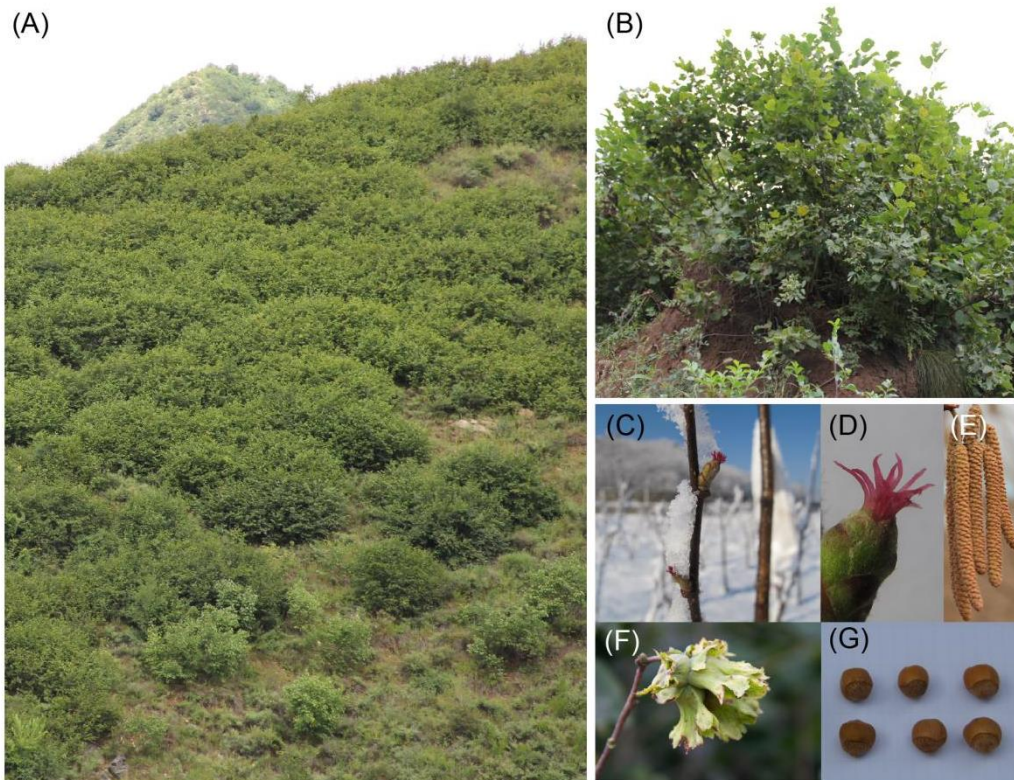

3

4 Figure1: Morphological characters of the hazelnut variety, *C. heterophylla*. Mature  
5 plants in panel (A) and (B), female inflorescence of (C) and (D), male inflorescence  
6 (E), fruit with husk (F), and nuts (G) are shown.

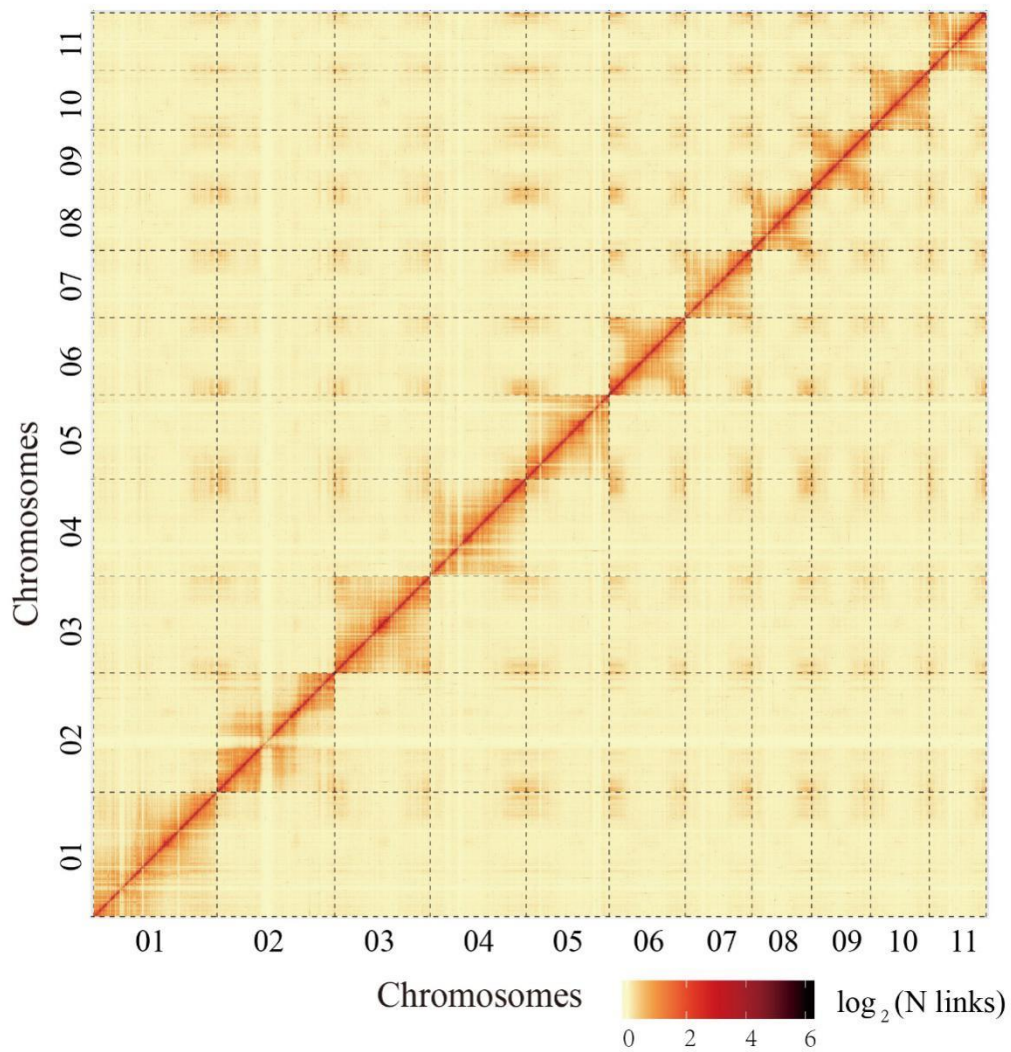

7

8 Figure2: Interaction frequency distribution of Hi-C links among eleven chromosomes.

9 Genome-wide Hi-C map of *C. heterophylla*. We scanned the genome by 500-kb

10 nonoverlapping window as a bin and calculated valid interaction links of Hi-C data

11 between any pair of bins. The  $\log_2$  of link number was transformed. The color key of

12 heatmap ranging from light yellow to dark red represented the frequency of Hi-C

13 interaction links from low to high (0~6).

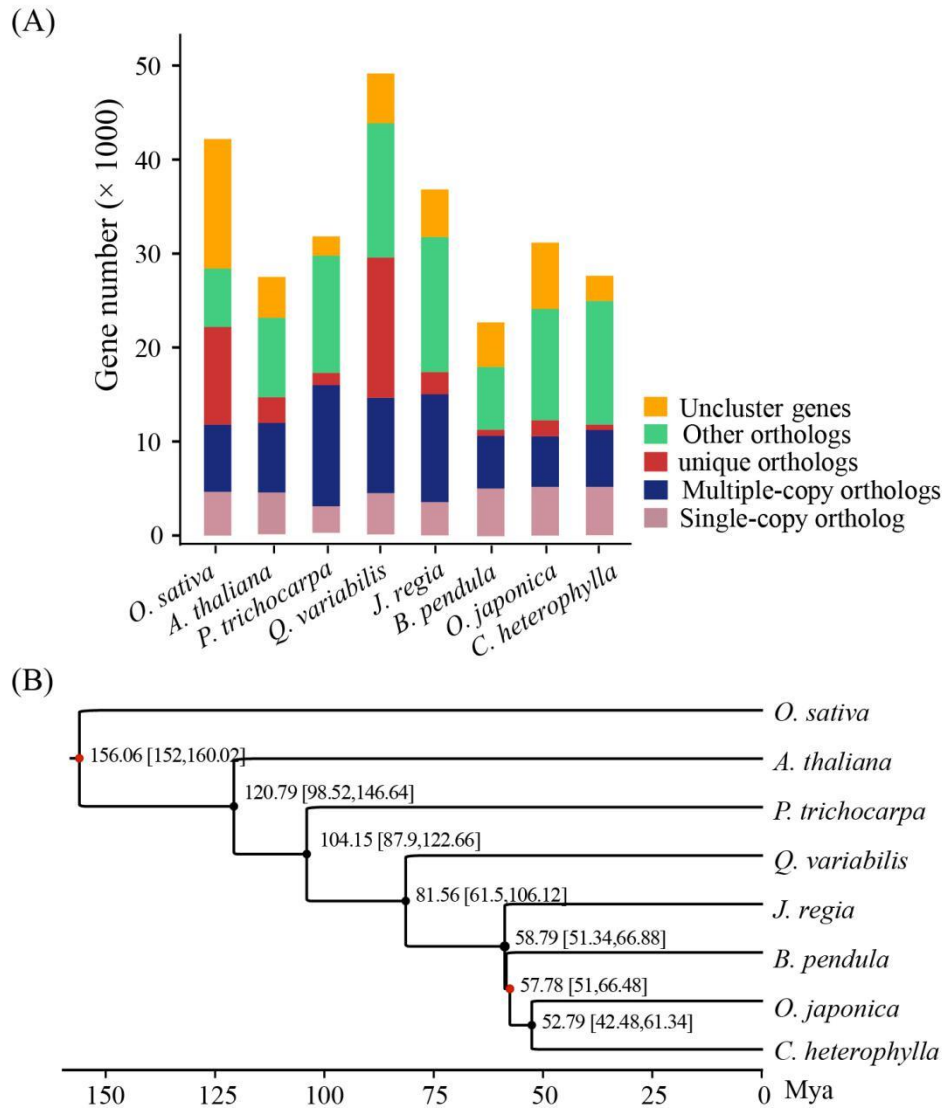

14

15 Figure3: Genome evolution analysis of *C. heterophylla*. (A) Summary of gene family  
 16 clustering of *C. heterophylla* and 7 related species. Single-copy ortholog, one copy  
 17 genes in ortholog group. Multiple-copy orthologs, multiple genes in ortholog group.  
 18 Unique orthologs, species-specific genes. Other orthologs, the rest of the clustered  
 19 genes. Uncluster genes, number of genes out of cluster. (B) Phylogenetic relationship  
 20 and divergence time estimation (MYA, millions of years ago). The *O. sativa* was  
 21 considered as outgroup in phylogenetic tree construction. The red dots indicate the  
 22 fossil correction time of *O. sativa* vs *P. trichocarpa* (152 - 160 Mya) and crown nodes  
 23 of family Betulaceae (51.2 - 66.7 Mya), respectively.

24



25 Table 1. Statistics of assembly results of *C. heterophylla* genome.

| Feature                      | <i>C. heterophylla</i> |
|------------------------------|------------------------|
| Genome size (bp)             | 370,750,808            |
| Contig number                | 1,328                  |
| Maximum contig length (bp)   | 9,680,353              |
| Contig N50 (bp)              | 2,068,510              |
| Contig L50                   | 48                     |
| Contig N90 (bp)              | 125,301                |
| Scaffold number              | 951                    |
| Maximum scaffold length (bp) | 46,514,939             |
| Scaffold N50 (bp)            | 31,328,411             |
| Scaffold L50                 | 5                      |
| Scaffold N90 (bp)            | 21,561,575             |
| GC content (%)               | 35.84                  |
| Gene number                  | 27,591                 |
| Gene length (bp)             | 123,431,253            |
| Average gene length (bp)     | 4,473.61               |
| Exon number                  | 138,886                |
| Exon length (bp)             | 33,679,425             |
| Intron number                | 138,885                |
| Intron length (bp)           | 89,751,828             |
| Pseudogenes                  | 2,988                  |
| Pseudogene length (bp)       | 7,166,319              |

26 Note: only sequences whose length is more than 1 kb are considered.

27

Table 2. Summary of eleven pseudo-chromosomes for *C. heterophylla*.

| Chr       | No. of clustered sequences | Length of clustered sequences (bp) | No. of ordered sequences | Length of ordered sequences (bp) |
|-----------|----------------------------|------------------------------------|--------------------------|----------------------------------|
| LG01      | 114                        | 49,577,893                         | 56                       | 46,509,439                       |
| LG02      | 113                        | 48,019,691                         | 49                       | 44,425,769                       |
| LG03      | 67                         | 37,395,073                         | 33                       | 36,016,943                       |
| LG04      | 95                         | 38,562,170                         | 53                       | 36,392,613                       |
| LG05      | 85                         | 34,656,877                         | 37                       | 31,324,811                       |
| LG06      | 76                         | 31,263,564                         | 31                       | 28,814,739                       |
| LG07      | 103                        | 29,494,057                         | 36                       | 25,003,895                       |
| LG08      | 45                         | 23,716,498                         | 23                       | 22,749,571                       |
| LG09      | 41                         | 23,427,462                         | 17                       | 22,292,654                       |
| LG10      | 41                         | 23,093,417                         | 25                       | 22,249,747                       |
| LG11      | 53                         | 22,694,573                         | 28                       | 21,558,875                       |
| Total (%) | 833 (62.73)                | 361,901,275 (97.62)                | 388 (46.58)              | 337,339,056 (93.21)              |

28

29 Table 3. Genome completeness assessment by BUSCO.

| Categories                      | Number | Percent (%) |
|---------------------------------|--------|-------------|
| Complete BUSCOs                 | 1,346  | 93.47       |
| Complete and single-copy BUSCOs | 1,296  | 90.00       |
| Complete and duplicated BUSCOs  | 50     | 3.47        |
| Fragmented BUSCOs               | 17     | 1.18        |
| Missing BUSCOs                  | 77     | 5.35        |
| Total BUSCO groups searched     | 1,440  | 100.00      |

30

31 Table 4. Repetitive elements in the *C. heterophylla* genome.

| Classes            | Number  | Length (bp) | Percent (%) |
|--------------------|---------|-------------|-------------|
| ClassI             | 584,311 | 169,738,018 | 45.78       |
| ClassI/DIRS        | 18,638  | 7,059,337   | 1.9         |
| ClassI/LARD        | 303,288 | 76,033,830  | 20.51       |
| ClassI/LINE        | 60,182  | 18,890,786  | 5.1         |
| ClassI/LTR/Copia   | 101,158 | 38,719,023  | 10.44       |
| ClassI/LTR/Gypsy   | 83,300  | 41,302,761  | 11.14       |
| ClassI/LTR/Unknown | 1,953   | 1,080,718   | 0.29        |
| ClassI/PLE         | 5,600   | 4,125,513   | 1.11        |
| ClassI/SINE        | 5,344   | 1,058,985   | 0.29        |
| ClassI/TRIM        | 3,828   | 1,023,113   | 0.28        |
| ClassI/Unknown     | 1,020   | 244,561     | 0.07        |
| ClassII            | 77,407  | 24,382,510  | 6.58        |
| ClassII/Crypton    | 455     | 109,226     | 0.03        |
| ClassII/Helitron   | 27,254  | 8,348,317   | 2.25        |
| ClassII/MITE       | 1,112   | 194,088     | 0.05        |
| ClassII/Maverick   | 754     | 165,986     | 0.04        |
| ClassII/TIR        | 44,403  | 15,342,483  | 4.14        |
| ClassII/Unknown    | 3,429   | 459,116     | 0.12        |
| PotentialHostGene  | 46,369  | 9,994,181   | 2.7         |
| SSR                | 1,135   | 265,113     | 0.07        |
| Unknown            | 116,728 | 26,584,597  | 7.17        |
| Total              | 825,950 | 210,255,221 | 56.71       |

32 DIRS: dictyostelium intermediate repeat sequence; LARD: large retrotransposon

33 derivative; LINE: long interspersed nuclear element; LTR: long terminal repeat;

34 MITE: miniature inverted-repeat transposable element; PLE: Penelope-like element;

35 SINE: short interspersed nuclear element; SSR: simple sequence repeat; TIR: terminal

36 inverted repeat; TRIM: terminal-repeat retrotransposons in miniature.

37

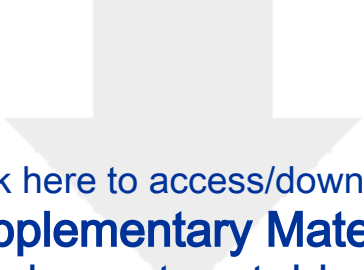

Click here to access/download  
**Supplementary Material**  
Supplementary tables.xls





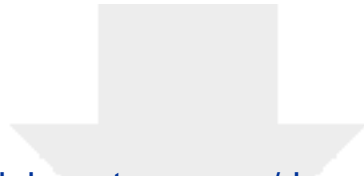

Click here to access/download  
**Supplementary Material**  
Supplementary figures.docx

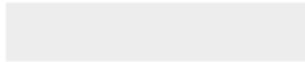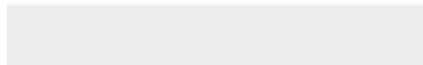

Supplement: giab027_giga-d-20-00312_original_submission.pdf [file giab027_giga-d-20-00312_original_submission.pdf]
