# Supplementary material for: A chromosome-level reference genome of the hazelnut, Corylus heterophylla Fisch
Source: PubMed Central journal article supplement (PMC8054262; doi:10.1093/gigascience/giab027), 2021-04-19

|                                                      |                                                                                                                                                                                                                                                                                                                                                                                                                                                                                                                                                                                                                                                                                                                                                                                                                                                                                                                                                                                                                                                                                                                                                                                                                                                                                                                                                                                                                                                                                                                                                                                                                                                                                      |                |
|------------------------------------------------------|--------------------------------------------------------------------------------------------------------------------------------------------------------------------------------------------------------------------------------------------------------------------------------------------------------------------------------------------------------------------------------------------------------------------------------------------------------------------------------------------------------------------------------------------------------------------------------------------------------------------------------------------------------------------------------------------------------------------------------------------------------------------------------------------------------------------------------------------------------------------------------------------------------------------------------------------------------------------------------------------------------------------------------------------------------------------------------------------------------------------------------------------------------------------------------------------------------------------------------------------------------------------------------------------------------------------------------------------------------------------------------------------------------------------------------------------------------------------------------------------------------------------------------------------------------------------------------------------------------------------------------------------------------------------------------------|----------------|
| <b>Manuscript Number:</b>                            | GIGA-D-20-00312R1                                                                                                                                                                                                                                                                                                                                                                                                                                                                                                                                                                                                                                                                                                                                                                                                                                                                                                                                                                                                                                                                                                                                                                                                                                                                                                                                                                                                                                                                                                                                                                                                                                                                    |                |
| <b>Full Title:</b>                                   | A chromosome-level reference genome of the hazelnut, <i>Corylus heterophylla</i> Fisch.                                                                                                                                                                                                                                                                                                                                                                                                                                                                                                                                                                                                                                                                                                                                                                                                                                                                                                                                                                                                                                                                                                                                                                                                                                                                                                                                                                                                                                                                                                                                                                                              |                |
| <b>Article Type:</b>                                 | Data Note                                                                                                                                                                                                                                                                                                                                                                                                                                                                                                                                                                                                                                                                                                                                                                                                                                                                                                                                                                                                                                                                                                                                                                                                                                                                                                                                                                                                                                                                                                                                                                                                                                                                            |                |
| <b>Funding Information:</b>                          | Special Investigation on Basic Resources of Science and Technology (2019FY100801_03)                                                                                                                                                                                                                                                                                                                                                                                                                                                                                                                                                                                                                                                                                                                                                                                                                                                                                                                                                                                                                                                                                                                                                                                                                                                                                                                                                                                                                                                                                                                                                                                                 | Not applicable |
|                                                      | Basic Scientific Research Business of Central Public Research Institutes of the Chinese Academy of Forestry, China (RIF-12 and CAFYBB2017ZA004-9)                                                                                                                                                                                                                                                                                                                                                                                                                                                                                                                                                                                                                                                                                                                                                                                                                                                                                                                                                                                                                                                                                                                                                                                                                                                                                                                                                                                                                                                                                                                                    | Not applicable |
| <b>Abstract:</b>                                     | <p><b>Background:</b> <i>Corylus heterophylla</i> Fisch. is a species of the Betulaceae family native to China. As an economically and ecologically important nut tree, <i>C. heterophylla</i> can survive in extremely low temperatures (−30 to −40 °C). To deepen our knowledge of the Betulaceae species and facilitate the use of <i>C. heterophylla</i> for breeding and its genetic improvement, we have sequenced the whole genome of <i>C. heterophylla</i>.</p> <p><b>Findings:</b> Based on over 64.99 Gb (~175.31 x) of Nanopore long reads, we assembled a 370.75 Mb <i>C. heterophylla</i> genome with contig N50 and scaffold N50 sizes of 2.01 Mb and 31.33Mb, respectively, accounting for 99.2% of the estimated genome size. Furthermore, 361.8 Mb contigs were anchored to 11 chromosomes using Hi-C links data, representing 97.62% of the assembled genome sequences. Transcriptomes representing four different tissues were sequenced to assist protein-coding gene prediction. A total of 27,591 protein-coding genes were identified, of which 92.2% (25,389) were functionally annotated. The phylogenetic analysis showed that <i>C. heterophylla</i> is close to <i>Ostrya japonica</i>, and they diverged from their common ancestor approximately 52.79 million years ago.</p> <p><b>Conclusions:</b> We generated a high-quality chromosome-level genome of <i>C. heterophylla</i>. This genome resource will promote research on the molecular mechanisms of how the hazelnut responds to environmental stresses and serves as an important resource for genome-assisted improvement in cold and drought resistance of the <i>Corylus</i> genus.</p> |                |
| <b>Corresponding Author:</b>                         | Lujun Wang<br>Anhui Academy of Forestry<br>Hefei, CHINA                                                                                                                                                                                                                                                                                                                                                                                                                                                                                                                                                                                                                                                                                                                                                                                                                                                                                                                                                                                                                                                                                                                                                                                                                                                                                                                                                                                                                                                                                                                                                                                                                              |                |
| <b>Corresponding Author Secondary Information:</b>   |                                                                                                                                                                                                                                                                                                                                                                                                                                                                                                                                                                                                                                                                                                                                                                                                                                                                                                                                                                                                                                                                                                                                                                                                                                                                                                                                                                                                                                                                                                                                                                                                                                                                                      |                |
| <b>Corresponding Author's Institution:</b>           | Anhui Academy of Forestry                                                                                                                                                                                                                                                                                                                                                                                                                                                                                                                                                                                                                                                                                                                                                                                                                                                                                                                                                                                                                                                                                                                                                                                                                                                                                                                                                                                                                                                                                                                                                                                                                                                            |                |
| <b>Corresponding Author's Secondary Institution:</b> |                                                                                                                                                                                                                                                                                                                                                                                                                                                                                                                                                                                                                                                                                                                                                                                                                                                                                                                                                                                                                                                                                                                                                                                                                                                                                                                                                                                                                                                                                                                                                                                                                                                                                      |                |
| <b>First Author:</b>                                 | Tiantian Zhao                                                                                                                                                                                                                                                                                                                                                                                                                                                                                                                                                                                                                                                                                                                                                                                                                                                                                                                                                                                                                                                                                                                                                                                                                                                                                                                                                                                                                                                                                                                                                                                                                                                                        |                |
| <b>First Author Secondary Information:</b>           |                                                                                                                                                                                                                                                                                                                                                                                                                                                                                                                                                                                                                                                                                                                                                                                                                                                                                                                                                                                                                                                                                                                                                                                                                                                                                                                                                                                                                                                                                                                                                                                                                                                                                      |                |
| <b>Order of Authors:</b>                             | Tiantian Zhao                                                                                                                                                                                                                                                                                                                                                                                                                                                                                                                                                                                                                                                                                                                                                                                                                                                                                                                                                                                                                                                                                                                                                                                                                                                                                                                                                                                                                                                                                                                                                                                                                                                                        |                |
|                                                      | Wenxu Ma                                                                                                                                                                                                                                                                                                                                                                                                                                                                                                                                                                                                                                                                                                                                                                                                                                                                                                                                                                                                                                                                                                                                                                                                                                                                                                                                                                                                                                                                                                                                                                                                                                                                             |                |
|                                                      | Zhen Yang                                                                                                                                                                                                                                                                                                                                                                                                                                                                                                                                                                                                                                                                                                                                                                                                                                                                                                                                                                                                                                                                                                                                                                                                                                                                                                                                                                                                                                                                                                                                                                                                                                                                            |                |
|                                                      | Lisong Liang                                                                                                                                                                                                                                                                                                                                                                                                                                                                                                                                                                                                                                                                                                                                                                                                                                                                                                                                                                                                                                                                                                                                                                                                                                                                                                                                                                                                                                                                                                                                                                                                                                                                         |                |
|                                                      | Xin Chen                                                                                                                                                                                                                                                                                                                                                                                                                                                                                                                                                                                                                                                                                                                                                                                                                                                                                                                                                                                                                                                                                                                                                                                                                                                                                                                                                                                                                                                                                                                                                                                                                                                                             |                |
|                                                      | Guixi Wang                                                                                                                                                                                                                                                                                                                                                                                                                                                                                                                                                                                                                                                                                                                                                                                                                                                                                                                                                                                                                                                                                                                                                                                                                                                                                                                                                                                                                                                                                                                                                                                                                                                                           |                |
|                                                      | Qinghua Ma                                                                                                                                                                                                                                                                                                                                                                                                                                                                                                                                                                                                                                                                                                                                                                                                                                                                                                                                                                                                                                                                                                                                                                                                                                                                                                                                                                                                                                                                                                                                                                                                                                                                           |                |
|                                                      | Lujun Wang                                                                                                                                                                                                                                                                                                                                                                                                                                                                                                                                                                                                                                                                                                                                                                                                                                                                                                                                                                                                                                                                                                                                                                                                                                                                                                                                                                                                                                                                                                                                                                                                                                                                           |                |

| Order of Authors Secondary Information: |                                                                                                                                                                                                                                                                                                                                                                                                                                                                                                                                                                                                                                                                                                                                                                                                                                                                                                                                                                                                                                                                                                                                                                                                                                                                                                                                                                                                                                                                                                                                                                                                                                                                                                                                                                                                                                                                                                                                                                                                                                                                                                                                                                                                                                                                                                                                                                                                                                                                                                                                                                                                                                                                                                                                                                                                                                                                                                                                                                                                                                                                                                                                                                                                                                                                                                                                                                                                                                                                                                                                                                                                            |
|-----------------------------------------|------------------------------------------------------------------------------------------------------------------------------------------------------------------------------------------------------------------------------------------------------------------------------------------------------------------------------------------------------------------------------------------------------------------------------------------------------------------------------------------------------------------------------------------------------------------------------------------------------------------------------------------------------------------------------------------------------------------------------------------------------------------------------------------------------------------------------------------------------------------------------------------------------------------------------------------------------------------------------------------------------------------------------------------------------------------------------------------------------------------------------------------------------------------------------------------------------------------------------------------------------------------------------------------------------------------------------------------------------------------------------------------------------------------------------------------------------------------------------------------------------------------------------------------------------------------------------------------------------------------------------------------------------------------------------------------------------------------------------------------------------------------------------------------------------------------------------------------------------------------------------------------------------------------------------------------------------------------------------------------------------------------------------------------------------------------------------------------------------------------------------------------------------------------------------------------------------------------------------------------------------------------------------------------------------------------------------------------------------------------------------------------------------------------------------------------------------------------------------------------------------------------------------------------------------------------------------------------------------------------------------------------------------------------------------------------------------------------------------------------------------------------------------------------------------------------------------------------------------------------------------------------------------------------------------------------------------------------------------------------------------------------------------------------------------------------------------------------------------------------------------------------------------------------------------------------------------------------------------------------------------------------------------------------------------------------------------------------------------------------------------------------------------------------------------------------------------------------------------------------------------------------------------------------------------------------------------------------------------------|
| <p><b>Response to Reviewers:</b></p>    | <p>19 February, 2021<br/> Editor : Dr. Hongling Zhou<br/> GigaScience<br/> Ms. No. GIGA-D-20-00312</p> <p>Dear Dr. Hongling Zhou,<br/> We appreciate the time and effort that you and reviewers dedicated to provide the helpful feedback on our manuscript "A chromosome-level reference genome of the hazelnut, <i>Corylus heterophylla</i> Fisch"(GIGA-D-20-00312). We have carefully revised our manuscript in light of your extensive and helpful comments and those of the reviewers. We have added the RRID of the biological tools obtained from SciCrunch.org database into the revised manuscript. In order to make the figure more neat and appropriate, we adjusted Figure 1 (C, D) and replaced them with new photos. We also revised the corresponding figure legends of Figure 1. Here we resubmit our revised manuscript to Journal of the GigaScience. Below please find a detailed response to the questions raised by the reviewers. During the proof reading and revision of this paper, Dr. Xin Chen has given us great help, so with the consent of all the authors, we hope to add him as one of the co-authors of this paper. Finally, the revised manuscript has obtained a language editing help from Charlesworth Author Services Team. We hope the revised manuscript would satisfy you and reviewers.</p> <p>Thank you again for your time and effort.</p> <p>Sincerely,</p> <p>Lujun Wang</p> <p>Response to Reviewer #1:<br/> 1 Reviewer's comment: Lines 46-50: A reference for these statements is needed.<br/> Author's response: Thanks for the reviewer helpful comments for our work. As suggested, we added reference in line 52.</p> <p>2 Reviewer's comment: Line 54: What is meant by "most economically wild"?<br/> Author's response: Thanks to reviewer's attention. To avoid confusion, we rewrote this sentence as "<i>Corylus heterophylla</i> is one of the most important economic <i>Corylus</i> species. Among the 1.67 million ha of wild <i>Corylus</i> in China, <i>C. heterophylla</i> occupies 90% of the area." in the revised manuscript.</p> <p>3 Reviewer's comment: Line-s 242-243: It appears that you are confusing ortholog groups with gene families. OrthoMCL is used to detect ortholog groups, not gene families.<br/> Author's response: We agree with reviewer's opinion. We replaced the "gene families" to "ortholog groups" in the revised manuscript.</p> <p>4 Reviewer's comment: Line 290: Hexadecyltrimethyl is missing the "l" at the end.<br/> Author's response: Sorry for this spelling mistake. We have corrected this mistake in the revised manuscript.</p> <p>Response to Reviewer #2:<br/> 1 Reviewer's comment: The accession IDs for NCBI and SRA were still missing from this version, I would like to request that the data be deposited to the repository upon publication of the assembly.<br/> Author's response: Many thanks for reviewer's helpful suggestion. As suggested, we have add the NCBI accession IDs for genome (JADOBO000000000) and SRA (SRR12458330, SRR12458329, SRR12458328, SRR12458327) at Availability of supporting data section (lines 346-350)</p> <p>2 Reviewer's comment: The paper needs proof reading and help from a native English speaking person.<br/> Author's response: As reviewer's suggestion, the paper has been send to Charlesworth Author Services Team for English language revision.</p> <p>3 Reviewer's comment: Line 16: economically and ecologically important nut tree<br/> Author's response: We have corrected this sentence in the revised manuscript.</p> |

|                                                                                                                                                                                         |                                                                                                                                                                                                                                                                                                                                                                                                                                                                                                                                                                                                                                                                                                                                                                                                                                                                                                                                                                                                                                                                                                                                                                                                                                                                                                                                                                                                                                                                                                                                                                                                                                                                                                                                                                                                                                                                                                                                                                                                                                                                                                                                                                                                                                                                                                                                                                                                                                                                                             |
|-----------------------------------------------------------------------------------------------------------------------------------------------------------------------------------------|---------------------------------------------------------------------------------------------------------------------------------------------------------------------------------------------------------------------------------------------------------------------------------------------------------------------------------------------------------------------------------------------------------------------------------------------------------------------------------------------------------------------------------------------------------------------------------------------------------------------------------------------------------------------------------------------------------------------------------------------------------------------------------------------------------------------------------------------------------------------------------------------------------------------------------------------------------------------------------------------------------------------------------------------------------------------------------------------------------------------------------------------------------------------------------------------------------------------------------------------------------------------------------------------------------------------------------------------------------------------------------------------------------------------------------------------------------------------------------------------------------------------------------------------------------------------------------------------------------------------------------------------------------------------------------------------------------------------------------------------------------------------------------------------------------------------------------------------------------------------------------------------------------------------------------------------------------------------------------------------------------------------------------------------------------------------------------------------------------------------------------------------------------------------------------------------------------------------------------------------------------------------------------------------------------------------------------------------------------------------------------------------------------------------------------------------------------------------------------------------|
|                                                                                                                                                                                         | <p>4 Reviewer's comment: Line 19: Nanopore (capital letter)<br/>Author's response: We have corrected the "nanopore" as "Nanopore" in the revised manuscript.</p> <p>5 Reviewer's comment: Line 29: bad english: molecular mechanism of hazelnut responding to environmental stress and serve as a resource -&gt;molecular mechanisms of how hazel nut responds to environmental stresses and serves as a resource (or similar)<br/>Author's response: As reviewer's suggestion, we have corrected this sentence as "This genome resource will promote research on the molecular mechanisms of how the hazelnut responds to environmental stresses and serves as an important resource for genome-assisted improvement in cold and drought resistance of the Corylus genus" in the revised manuscript (lines 31-34).</p> <p>6 Reviewer's comment: 35: provides<br/>Author's response: As suggested, we have corrected the word "provide" as "provides" in the revised manuscript.</p> <p>7 Reviewer's comment: 36: There is a high content<br/>Author's response: We have corrected "are" as "is" in the revised manuscript.</p> <p>8 Reviewer's comment: 39 ranges (or varies between)<br/>Author's response: We revised this spelling mistake as "ranges" in the revised manuscript.</p> <p>9 Reviewer's comment: 45: Inadequate<br/>Author's response: We have revised the spelling mistake as "Inadequate" in the revised manuscript.</p> <p>10 Reviewer's comment: 54: "one of the most economically wild Corylus species" - what does this mean?<br/>Author's response: To avoid confusion, we have revised this sentence as "Corylus heterophylla is one of the most important economic Corylus species. Among the 1.67 million ha of wild Corylus in China, C. heterophylla occupies 90% of the area." in the revised manuscript (lines 54-55).</p> <p>11 Reviewer's comment: 85 Qbit -&gt; Qubit<br/>Author's response: We revised this spelling mistake as "Qubit" in the revised manuscript.</p> <p>12 Reviewer's comment: 109: fuorometry -&gt; fluorometry<br/>Author's response: We revised the spelling mistake as "fluorometry" in the revised manuscript.</p> <p>13 Reviewer's comment: 253: this is the monocot - dicot split time<br/>Author's response: Thanks for reviewer's comment. To avoid confusion, we revised this sentence as "The monocot-dicot split time (152 - 160 Mya) getting from TimeTree database was also used to calibrate the time estimation".</p> |
| <b>Additional Information:</b>                                                                                                                                                          |                                                                                                                                                                                                                                                                                                                                                                                                                                                                                                                                                                                                                                                                                                                                                                                                                                                                                                                                                                                                                                                                                                                                                                                                                                                                                                                                                                                                                                                                                                                                                                                                                                                                                                                                                                                                                                                                                                                                                                                                                                                                                                                                                                                                                                                                                                                                                                                                                                                                                             |
| <b>Question</b>                                                                                                                                                                         | <b>Response</b>                                                                                                                                                                                                                                                                                                                                                                                                                                                                                                                                                                                                                                                                                                                                                                                                                                                                                                                                                                                                                                                                                                                                                                                                                                                                                                                                                                                                                                                                                                                                                                                                                                                                                                                                                                                                                                                                                                                                                                                                                                                                                                                                                                                                                                                                                                                                                                                                                                                                             |
| Are you submitting this manuscript to a special series or article collection?                                                                                                           | No                                                                                                                                                                                                                                                                                                                                                                                                                                                                                                                                                                                                                                                                                                                                                                                                                                                                                                                                                                                                                                                                                                                                                                                                                                                                                                                                                                                                                                                                                                                                                                                                                                                                                                                                                                                                                                                                                                                                                                                                                                                                                                                                                                                                                                                                                                                                                                                                                                                                                          |
| <b>Experimental design and statistics</b>                                                                                                                                               | Yes                                                                                                                                                                                                                                                                                                                                                                                                                                                                                                                                                                                                                                                                                                                                                                                                                                                                                                                                                                                                                                                                                                                                                                                                                                                                                                                                                                                                                                                                                                                                                                                                                                                                                                                                                                                                                                                                                                                                                                                                                                                                                                                                                                                                                                                                                                                                                                                                                                                                                         |
| Full details of the experimental design and statistical methods used should be given in the Methods section, as detailed in our <a href="#">Minimum Standards Reporting Checklist</a> . |                                                                                                                                                                                                                                                                                                                                                                                                                                                                                                                                                                                                                                                                                                                                                                                                                                                                                                                                                                                                                                                                                                                                                                                                                                                                                                                                                                                                                                                                                                                                                                                                                                                                                                                                                                                                                                                                                                                                                                                                                                                                                                                                                                                                                                                                                                                                                                                                                                                                                             |

|                                                                                                                                                                                                                                                                                                                                                                                                                                                                                                                                                         |            |
|---------------------------------------------------------------------------------------------------------------------------------------------------------------------------------------------------------------------------------------------------------------------------------------------------------------------------------------------------------------------------------------------------------------------------------------------------------------------------------------------------------------------------------------------------------|------------|
| <p>Information essential to interpreting the data presented should be made available in the figure legends.</p> <p>Have you included all the information requested in your manuscript?</p>                                                                                                                                                                                                                                                                                                                                                              |            |
| <p><b>Resources</b></p> <p>A description of all resources used, including antibodies, cell lines, animals and software tools, with enough information to allow them to be uniquely identified, should be included in the Methods section. Authors are strongly encouraged to cite <a href="#">Research Resource Identifiers</a> (RRIDs) for antibodies, model organisms and tools, where possible.</p> <p>Have you included the information requested as detailed in our <a href="#">Minimum Standards Reporting Checklist</a>?</p>                     | <p>Yes</p> |
| <p><b>Availability of data and materials</b></p> <p>All datasets and code on which the conclusions of the paper rely must be either included in your submission or deposited in <a href="#">publicly available repositories</a> (where available and ethically appropriate), referencing such data using a unique identifier in the references and in the “Availability of Data and Materials” section of your manuscript.</p> <p>Have you have met the above requirement as detailed in our <a href="#">Minimum Standards Reporting Checklist</a>?</p> | <p>Yes</p> |

1           **A chromosome-level reference genome of the hazelnut, *Corylus heterophylla* Fisch.**

2

3   Tiantian Zhao<sup>1,3</sup>, Wenxu Ma<sup>1,3</sup>, Zhen Yang<sup>1,3</sup>, Lisong Liang<sup>1,3</sup>, Xin Chen<sup>3,4</sup>, Guixi Wang<sup>1,3</sup>,  
4   Qinghua Ma<sup>1,3\*</sup>, Lujun Wang<sup>2,3\*</sup>

5

6   <sup>1</sup>Research Institute of Forestry, Chinese Academy of Forestry/Key Laboratory of Tree Breeding  
7   and Cultivation of the State Forestry and Grassland Administration, No.1 Dongxiaofu,  
8   Xiangshan Road, Haidian District, Beijing 100091, China; <sup>2</sup>Anhui Academy of Forestry, No.  
9   820 Changjiangxi Road, Shushan District, Hefei 230031, China; <sup>3</sup>National Hazelnut Industry  
10   Innovation Alliance/Hazelnut Engineering and Technical Research Center of the State Forestry  
11   and Grassland Administration, Xiangshan Road, Haidian District, Beijing 100091, China;

12   <sup>4</sup>Shandong Institute of Pomology, Shandong Academy of Agricultural Sciences, No.66 Longtan  
13   Road, Taishan District, Taian 271000, China

14   \*Correspondence address: Qinghua Ma, Research Institute of Forestry, Chinese Academy of Forestry, No.1  
15   Dongxiaofu, Xiangshan Road, Haidian District, Beijing 100091, China. E-mail: mqhmary@sina.com; Lujun  
16   Wang, Anhui Academy of Forestry, No. 820 Changjiangxi Road, Shushan District, Hefei 230031, China.  
17   E-mail: [wanglujun1984@163.com](mailto:wanglujun1984@163.com)

18

19   **ORCID:**

20   Tiantian Zhao: <https://orcid.org/0000-0003-2700-5314>

21   Wenxu Ma: <https://orcid.org/0000-0002-0348-1167>

22   Zhen Yang: <https://orcid.org/0000-0002-6807-962X>

23   Lisong Liang: <https://orcid.org/0000-0002-0046-0168>

24   Xin Chen: <https://orcid.org/0000-0003-4538-7010>

25   Guixi Wang: <https://orcid.org/0000-0002-9949-6004>

26   Qinghua Ma: <https://orcid.org/0000-0002-6065-0852>

27   Lujun Wang: <https://orcid.org/0000-0002-8046-6067>

28

29

30

31 **Abstract**

32 **Background:** *Corylus heterophylla* Fisch. is a species of the Betulaceae family native to China.  
33 As an economically and ecologically important nut tree, *C. heterophylla* can survive in  
34 extremely low temperatures (−30 to −40 °C). To deepen our knowledge of the Betulaceae  
35 species and facilitate the use of *C. heterophylla* for breeding and its genetic improvement, we  
36 have sequenced the whole genome of *C. heterophylla*.

37 **Findings:** Based on over 64.99 Gb (~175.30 x) of Nanopore long reads, we assembled a 370.75  
38 Mb *C. heterophylla* genome with contig N50 and scaffold N50 sizes of 2.07 Mb and 31.33 Mb,  
39 respectively, accounting for 99.23% of the estimated genome size (373.61 Mb). Furthermore,  
40 361.90 Mb contigs were anchored to 11 chromosomes using Hi-C links data, representing 97.61%  
41 of the assembled genome sequences. Transcriptomes representing four different tissues were  
42 sequenced to assist protein-coding gene prediction. A total of 27,591 protein-coding genes were  
43 identified, of which 92.02% (25,389) were functionally annotated. The phylogenetic analysis  
44 showed that *C. heterophylla* is close to *Ostrya japonica*, and they diverged from their common  
45 ancestor approximately 52.79 million years ago.

46 **Conclusions:** We generated a high-quality chromosome-level genome of *C. heterophylla*. This  
47 genome resource will promote research on the molecular mechanisms of how the hazelnut  
48 responds to environmental stresses and serves as an important resource for genome-assisted  
49 improvement in cold and drought resistance of the *Corylus* genus.

50

51 **Background**

52 The *Corylus* genus, a member of the birch family Betulaceae and an economically and  
53 ecologically important nut tree species, is widely distributed throughout temperate regions of  
54 the Northern Hemisphere [1]. As a valuable nut crop, hazelnut provides the predominant flavor  
55 in a variety of cakes, candies, chocolate spreads, and butters. There is a high content of  
56 unsaturated fatty acids and several essential vitamins in hazelnut oil.

57 The number of *Corylus* species recognized by taxonomists ranges from 7 to 25, depending on  
58 different morphological and molecular classifications [2, 3]. Among these, the European  
59 hazelnut, *Corylus avellana* L., is the most widely commercially cultivated species, with more  
60 than 400 cultivars having been described [4]. Commercial cultivation of *C. avellana* is limited

61 to regions with climates moderated by large bodies of water that have cool summers and mild,  
62 humid winters, such as the slopes on the Black Sea of Turkey or the Willamette Valley of  
63 Oregon [5, 6]. Inadequate cold hardiness is a major factor limiting the expansion of commercial  
64 production into northern and inland areas. When *C. avellana* was introduced into China, twigs  
65 withered and died almost every winter due to the cold, windy, and dry climate in northern China.  
66 In southern China, however, European hazelnut trees seemed to grow well but bore few nuts,  
67 and abortive kernels were observed frequently [7].

68 Eight species and two botanical varieties of *Corylus* are reported to be native to China [5]. The  
69 Asian hazel *Corylus heterophylla* (NCBI:txid80754) is one of the most important economic  
70 *Corylus* species. Among the 1.67 million ha of wild *Corylus* in China, *C. heterophylla* occupies  
71 90% of the geographic area [8]. Wild *C. heterophylla* is mainly distributed in the mountains  
72 from northern to northeastern China. The geographical distribution range is 36.78–51.73 (°N)  
73 and 100.57–132.20 (°E), where the main climate type is temperate. Compared with *C. avellana*,  
74 *C. heterophylla* can be adapted to regions with low temperatures (–30 to –40 °C) and drought  
75 conditions. Therefore, the cold and drought resistance characteristics of *C. heterophylla* can be  
76 used as parent materials for cross-breeding with other hazel species.

77 In the present study, to better understand the molecular mechanism of how hazelnuts respond to  
78 environmental stress, we assembled a high-quality genome of *C. heterophylla* using a  
79 combination of the Oxford Nanopore high-throughput sequencing technology and the  
80 high-throughput chromosome conformation capture (Hi-C) technique. Long reads were *de novo*  
81 assembled into 1,328 polished contigs with a total size of 370.75 Mb and contig N50 and  
82 scaffold N50 values of 2.07 Mb and 31.33 Mb, respectively, which is in line with genome sizes  
83 estimated using flow cytometry and *k*-mer analysis. A total of 361.90 Mb contigs were anchored  
84 into 11 chromosomes, representing 97.61% of the assembled genome. Our results provide a  
85 high-quality, chromosome-level genome assembly of *C. heterophylla*, which will support  
86 breeding programs leading to genetic improvement of hazelnuts. Furthermore, it will facilitate  
87 understanding of the special position of *Corylus* and Betulaceae in plant evolution.

88

89 **Data Description**

90 **Sample collection**

91 Fresh and healthy leaves were collected from a single wild *C. heterophylla* tree in Yanqing,  
92 Beijing, China (N: 40° 32' 27"; E: 116° 03' 52"; Fig. 1). The fresh leaf tissue was flash-frozen in  
93 liquid nitrogen for 30 min and then stored at -80 °C. DNA was extracted from leaf tissues  
94 following a previously published protocol [9]. Different tissues, including root, stem, staminate  
95 inflorescence, and leaf, were sampled and flash-frozen in liquid nitrogen for total RNA  
96 sequencing. Total RNA was extracted using the modified CTAB method [10].

97

### 98 **Library preparation and whole-genome sequencing**

99 Genomic DNA for library construction was isolated from leaf tissues using the DNeasy Plant  
100 Mini Kit (Qiagen, Beijing, CHN) according to the manufacturer's instructions. DNA  
101 concentrations and quality were measured using a NanoDrop 2000 (Thermo Fisher, Waltham,  
102 MA, USA) and Qubit Fluorometer (Thermo Fisher, Waltham, MA, USA), respectively. The  
103 gDNA was sheared to ~500 bp fragments using an S2 Focused-Ultrasonicator (Covaris Inc.,  
104 Woburn, MA, USA). Paired-end (PE) libraries were prepared using the TruSeq DNA PCR-Free  
105 Library Preparation Kit (Illumina, San Diego, CA, USA) according to the Illumina standard  
106 protocol. After quality control by an Agilent 2100 Bioanalyzer and qPCR, all PCR-free libraries  
107 were sequenced on an Illumina HiSeq X Ten system (Illumina, San Diego, CA, USA;  
108 RRID:SCR\_016385) with a 350 bp PE sequencing strategy according to the manufacturer's  
109 instructions. A total of 38.02 Gb (~102.55-fold coverage) clean reads were generated for the  
110 genome survey and Nanopore genome polishing (Supplementary Table S1a).

111

### 112 **Estimation of genome size and heterozygosity analysis**

113 Before genome assembly, we estimated the *C. heterophylla* genome's size using Jellyfish  
114 (RRID:SCR\_005491) [11] with an optimal *k*-mer size. A total of 38.02 Gb short reads (~102.55  
115 x) were processed by Jellyfish to assess their *k*-mer distribution (*k*-mer value = 19).  
116 Theoretically, the *k*-mer frequency follows a Poisson distribution. We selected *k* = 19 for the  
117 genome size estimation in this study. Genome sizes were calculated from the following  
118 equation: Genome size = 19-mer number / 19-mer depth, where 19-mer number is the total  
119 counts of each unique 19-mer and 19-mer depth is the highest frequency that occurred  
120 (Supplementary Fig. S1). The estimated genome size of *C. heterophylla* is 373.61 Mb.



121

## 122 **Nanopore, RNA, and Hi-C sequencing**

123 Genomic DNA was extracted and sequenced following the instructions of the Ligation  
124 Sequencing Kit (Oxford Nanopore Technologies, Oxford, UK). DNA quality was assessed by  
125 agarose gel electrophoresis and NanoDrop 2000c spectrophotometry, followed by Thermo  
126 Fisher Scientific Qubit fluorometry. After quality control, genomic DNA was size-selected  
127 using a Blue Pippin BLF7510 cassette (Sage Science, Beverly, MA, USA). Libraries  
128 (fragments > 20 kb) were prepared using the standard Ligation Sequencing kit (SQK-LSK109;  
129 Oxford Nanopore Technologies, Oxford, UK) and sequenced on the GridION X5 platform  
130 (Oxford Nanopore Technologies, Oxford, UK) with FLOMIN106 (R9.4) flow cells. Raw ONT  
131 reads (fastq) were extracted from base-called FAST5 files using poretools [12]. Then, the short  
132 reads (<5 kb) and reads having low-quality bases and adapter sequences (YSFRI, 2019c) were  
133 removed. A total of 64.99 Gb (~175.30-fold coverage) Nanopore long reads with an N50 length  
134 of 27.17 kb were produced for genome assembly (Supplementary Fig. S2, Supplementary  
135 Tables S1b and S1c).

136 Different tissues, including leaf, stem, root, and staminate inflorescence, were harvested and  
137 flash-frozen in liquid nitrogen for total RNA sequencing. Each sample was subjected to poly(A)  
138 purification using oligo-dT beads (Thermo Fisher, Waltham, MA, USA) followed by ribosomal  
139 (rRNA) removal using the Ribo-Zero rRNA Removal Kit (Illumina, San Diego, CA, USA). The  
140 RNA quality was measured by 2100 RNA Nano 6000 Assay Kit (Agilent Technologies, Santa  
141 Clara, CA, USA) and pooling together. The resulting RNA sample was used for cDNA library  
142 construction using the NEBNext Ultra RNA Library Prep Kit for Illumina (NEB, Ipswich, MA,  
143 USA). The quantified libraries were then prepared for sequencing on the Illumina HiSeq X Ten  
144 system, producing 9.66 Gb PE reads (Supplementary Table S1d).

145 Hi-C experiments were performed as described with some modifications [13, 14]. Briefly, 2 g of  
146 freshly harvested leaves were cut into 2- to 3-mm pieces and infiltrated in 2% formaldehyde  
147 before cross-linking was stopped by adding glycine. The tissue was ground to powder and  
148 suspended in nuclei isolation buffer to obtain a nuclei suspension. The procedure for the Hi-C  
149 experiment, including chromatin digestion, labeling of DNA ends, DNA ligation, purification,  
150 and fragmentation, was performed as described previously [15]. The cross-linked DNA was

151 digested with HindIII as previously described and marked by incubating with Klenow enzyme  
152 and biotin-14-dCTP overnight at 37 °C [15]. The 5' overhang of the fragments was repaired and  
153 labeled using biotinylated nucleotides, followed by ligation with T4 DNA polymerase. After  
154 reversal of cross-linking, ligated DNA was purified and sheared to 300–700 bp fragments using  
155 an S2 Focused-Ultrasonicator (Covaris Inc., MA, USA). The linked DNA fragments were  
156 enriched with streptavidin beads and prepared for Illumina HiSeq X Ten sequencing, producing  
157 231.31 Mb (totaling ~69.11 Gb) Hi-C links data (Supplementary Table S1e).

158

### 159 ***De novo* genome assembly and pseudo-chromosome construction**

160 After the self-error correction using the error correction model in Canu (Canu, RRID:  
161 SCR\_015880) v1.5 [16], the Nanopore long reads were assembled into contigs using  
162 WTDBG2 (WTDBG, RRID: SCR\_017225) v1.0 [17]. Two rounds of consensus correction  
163 were performed using Racon (Racon, RRID: SCR\_017642) v1.32 [18] with corrected  
164 Nanopore long reads, and the resulting assembly was further polished using Pilon (Pilon,  
165 RRID: SCR\_014731) [19] with 38.02 Gb Illumina short reads (Supplementary Table S1a).  
166 The assembled length of 1,291 contigs of *C. heterophylla* is 370.71 Mb, accounting for 99.22%  
167 of the estimated genome size (373.61 Mb). The contigs N50 and N90 were 2.11 Mb and  
168 138.6 kb, respectively.

169 The pseudo-chromosomes were constructed using Hi-C links data. The clean Hi-C reads were  
170 mapped to the consensus contigs using the Burrows-Wheeler Aligner [20] (BWA, RRID: SCR  
171 010910) v0.7.17, and only uniquely mapped read pairs were considered as high-quality read  
172 pairs in Hi-C analysis. The reads were removed if the mapped positions in the reference genome  
173 were further than 500 bp from the nearest restriction enzyme site. The quality assessment and  
174 normalization were performed using HiC-Pro (HiC-Pro, RRID: SCR\_017643) [21]. There were  
175 109,306,012 uniquely mapped PE reads, of which 58.33% (63,755,940) uniquely mapped reads  
176 were considered valid interaction pairs for chromosome construction (Supplementary Table S2).  
177 The contigs were then clustered, ordered, and oriented into 11 pseudo-chromosomes using  
178 LACHESIS (LACHESIS, RRID: SCR\_017644) [21]. Finally, we obtained a high-quality  
179 chromosome-level reference genome with a total size of 370.75 Mb. The contig N50 and  
180 scaffold N50 values were 2.07 Mb and 31.33 Mb, respectively (Table 1). A total of 361.90 Mb

181 contigs were anchored into 11 chromosomes, representing 97.61% of the assembled genome  
182 (Table 2).

183

#### 184 **Genome quality assessment**

185 Genome completeness was assessed using the plants dataset of the Benchmarking Universal  
186 Single-Copy Orthologs (BUSCO, RRID: SCR\_015008) database v1.22 [22], with e-value  $< 1e^{-5}$ .  
187 The BUSCO database detected 93.47% and 1.18% of complete and partial gene models,  
188 respectively, in the *C. heterophylla* assembly results (Table 3). The core eukaryotic  
189 gene-mapping approach (CEGMA, RRID: SCR\_015055) [23] provides a method to rapidly  
190 assess genome completeness because it comprises a set of highly conserved, single-copy genes,  
191 present in all eukaryotes, containing 458 core eukaryotic genes (CEGs). We identified CEGs  
192 using the CEGMA (CEGMA, RRID: SCR\_015055) v2.3 pipeline [23] and found that 430  
193 (93.89%) CEGs could be found in the assembly results (Supplementary Table S3a). The PE  
194 short libraries, including 103,392,992 paired reads, were remapped to the assembly genome  
195 with BWA-MEM (BWA, RRID: SCR\_010910) [24] to assess the completeness of the assembly  
196 results. More than 98.47% of these reads could be accurately mapped into genome sequences  
197 (Supplementary Table S3b). Additionally, the heatmap of the Hi-C interaction frequency was  
198 selected to visually assess the assembled accuracy of the *C. heterophylla* genome. The  
199 interaction heatmap was displayed at 100 kb resolution. LG01-LG11 represent the eleven  
200 chromosomes of the *C. heterophylla* genome ordered by chromosome length. The horizontal  
201 and vertical coordinates represent the order of each 'bin' on the corresponding chromosome.  
202 The signal intensities clearly divide the 'bins' into eleven distinct groups (LG01-LG11),  
203 demonstrating the high quality of the chromosome assignment (Fig. 2). These observations  
204 suggest the high quality and completeness of this chromosome-level reference genome for *C.*  
205 *heterophylla*.

206

#### 207 **Repetitive elements and protein-coding gene annotation**

208 Repetitive elements in the *C. heterophylla* genome were identified using a combined strategy  
209 of *de novo* and homology-based approaches at the DNA and protein levels. Tandem repeats  
210 were annotated using Tandem Repeat Finder (TRF). A repeat library was constructed using

211 MITE-Hunter (MITE-Hunter RRID: SCR\_020946) [25], LTR-FINDER (LTR Finder, RRID:  
212 SCR\_015247) v1.05 [26], RepeatScout (RepeatScout, RRID: SCR\_014653) v1.0.5 [27], and  
213 PILER (PILER, RRID: SCR\_017333) [28] for *de novo* repeat content annotation. The *de novo*  
214 repeat library was classified through PASTEClassifier (PASTEClassifier, RRID: SCR\_017645)  
215 v1.0 package [29] with default parameters and then integrated with Repbase (Repbase, RRID:  
216 SCR\_012954) v19.06 [30] to build a new repeat library. Finally, RepeatMasker (RepeatMasker,  
217 RRID: SCR\_012954) v4.0.6 [31] with parameters of “-nolow -no\_is -norna -engine wublast”  
218 was selected to identify and classify the genomic repetitive elements of *C. heterophylla*. In total,  
219 210.26 Mb of repetitive sequences were identified, accounting for 56.71% of *C.*  
220 *heterophylla* genome sequences (Table 4). The top three classes of repetitive elements were  
221 ClassI/LARD, ClassI/LTR/Gypsy, and ClassI/LTR/Copia, occupying 20.51%, 11.14%, and  
222 10.44% of assembled genome sequences, respectively (Table 4).

223 Gene annotation was performed using a combination of *ab initio* prediction, homology-based  
224 gene prediction, and transcript evidence from RNA-seq data. The *de novo* approach was  
225 implemented using Augustus (Augustus, RRID: SCR\_008417) v3.2.3 [32], GeneID (GeneID,  
226 RRID: SCR\_002473) v1.4.4 [33], GlimmerHMM (GlimmerHMM, RRID: SCR\_002654) v3.52  
227 [34], GenScan (GENSCAN, RRID: SCR\_012902) [35], and SNAP (SNAP, RRID:  
228 SCR\_007936) [36]. For homology-based prediction, TBLASTN (TBLASTN, RRID:  
229 SCR\_011822) v2.2.31 [37] was used to align predicted protein sequences of *Arabidopsis*  
230 *thaliana*, *Betula pendula*, *Juglans regia* and *Ostrya chinensis* to the *C. heterophylla* genome  
231 with an e-value threshold of  $1e^{-5}$ . Then, GeMoMa (GeMoMa, RRID: SCR\_017646) v1.3.1 [38]  
232 was employed for homology-based gene prediction. The transcriptome data from pooled tissues  
233 of leaf, stem, root, and staminate inflorescence from *C. heterophylla* were assembled into  
234 unigenes using HISAT (HISAT, RRID: SCR\_015530) v2.0.4 [39] and StringTie (StringTie,  
235 RRID: SCR\_016323) v1.2.3 [40]. Then unigenes were used to predict gene structures using  
236 TransDecoder (TransDecoder, RRID: SCR\_017647) v2.0 [41], GeneMarkS-T (GeneMarkS-T,  
237 RRID: SCR\_017648) v5.1 [42], and PASA (PASA, RRID: SCR\_014656) v2.0.2 [43]. Finally,  
238 the gene models obtained from the above three approaches were integrated into a consensus  
239 gene set using EVIDENCEModeler (EVIDENCEModeler, RRID: SCR\_014659) v1.1.0 [44] with  
240 default parameters. PASA (PASA, RRID: SCR\_014656) v2.0.2 [43] was then used to annotate

241 the gene structures, including UTRs and alternative-splice sites (Supplementary Fig. S3,  
242 Supplementary Table S4a). A total of 27,591 non-redundant protein-coding genes were  
243 predicted for the *C. heterophylla* genome (Table 1). Gene models were annotated by  
244 homologous searching against several databases using BLASTP (BLASTP, RRID:  
245 SCR\_001010) from BLAST+ package [37] (e-value =  $1e^{-5}$ ), including NR [45], KOG [46],  
246 TrEMBL (TrEMBL, RRID: SCR\_002380) [47], and KEGG (KEGG, RRID: SCR\_012773)  
247 [48]databases. InterProScan (InterProScan, RRID: SCR\_005829) v4.3 [49] was used to  
248 annotate the protein motifs and domains. The Blast2GO (Blast2GO, RRID: SCR\_005828) [50,  
249 51] pipeline was used to obtain GO terms annotation from the NCBI NR database. In total,  
250 25,389 protein-coding genes (92.02%) were successfully assigned into corresponding functions  
251 (Supplementary Table S4b).

252 Genome-wide pseudogene identification was carried out for *C. heterophylla*. Only candidate  
253 pseudogenes containing frameshifts and/or premature stop codons in their coding regions were  
254 considered as reliable pseudogenes. *C. heterophylla* proteins were aligned to the reference  
255 genome using GenBlastA (GenBlastA, RRID:SCR\_020951) v1.0.4 [52] to detect candidate  
256 homolog regions. Then, the candidate pseudogenes were identified using GeneWise (GeneWise,  
257 RRID: SCR\_015054) v2.4.1 [53]. Finally, 2,988 pseudogenes were identified in *C. heterophylla*  
258 genome sequences (Table 1).

259 Different types of non-coding RNA in the *C. heterophylla* genome were identified and classified  
260 as family and subfamily. The tRNAscan-SE (tRNAscan-SE, RRID: SCR\_010835) v1.23 [54]  
261 was applied to detect transfer RNAs (tRNAs). MicroRNAs (miRNAs) were identified by  
262 homolog searching miRBase (microRNA database (miRBase), RRID: SCR\_003152) v21 [55]  
263 against the *C. heterophylla* genome with one mismatch. Then, secondary structures of the  
264 putative sequences were predicted by miRDeep2 (miRDeep, RRID: SCR\_010829) [56]. Finally,  
265 putative miRNAs with hairpin structures were considered as reliable ones. Other types of  
266 non-coding RNA were detected using Infernal (Infernal, RRID: SCR\_011809) [57] (e-value  $\leq$   
267 0.01) based on the Rfam database (Rfam, RRID: SCR\_007891) v12.0 [58]. In total, 92 miRNAs,  
268 617 tRNAs, and 622 rRNAs were annotated in *C. heterophylla* genome sequences  
269 (Supplementary Table S4c).

270

## 271 **Gene family identification and phylogenetic tree construction**

272 In the gene family and phylogenetic analysis, the protein-coding genes of *Oryza sativa*,  
273 *Arabidopsis thaliana*, *Populus trichocarpa*, *Quercus variabilis*, *Juglans regia*, *Betula pendula*,  
274 *Ostrya japonica*, and *C. heterophylla* were downloaded from Genbank or Ensembl databases.  
275 The longest transcripts were selected to represent the protein-coding genes. Protein sequence  
276 clustering was performed using OrthoMCL (OrthoMCL, RRID: SCR\_007839) v2.0 [59] with  
277 default parameters to identify the orthologous groups. The result showed that *C. heterophylla*  
278 has 16,811 orthologous groups, including 5,150 single-copy genes, 6,040 multiple-copy genes,  
279 and 582 specific genes. Notably, 222 species-specific families were identified for *C.*  
280 *heterophylla*, which might contribute to its unique features (Fig. 3A). To construct the  
281 phylogenetic analysis, 1,182 single-copy orthologs were identified from one copy families of  
282 selected species. The protein sequences of single-copy orthologs were aligned using MUSCLE  
283 (MUSCLE, RRID: SCR\_011812) v3.8.31 [60], and low-quality alignment regions were  
284 removed using Gblocks (Gblocks, RRID: SCR\_015945) v0.91b [61] with default parameters. A  
285 phylogenetic tree was constructed using the maximum-likelihood method with the JTT amino  
286 acid substitution model implemented in the PhyML (PhyML, RRID: SCR\_014629) v3.3  
287 package [62]. The divergence time was estimated using the MCMCtree program in the PAML  
288 (Phylogenetic Analysis of Maximum-Likelihood; PAML, RRID: SCR\_014932) v4.7b  
289 package [63]. An age of (51.2 - 66.7 Mya) was used to calibrate the crown nodes of the family  
290 Betulaceae [64]. The monocot-dicot split time (152 - 160 Mya) obtained from the TimeTree  
291 database was also used to calibrate the time estimation [65]. The result showed that *C.*  
292 *heterophylla* is close to *O. japonica*, and they diverged from their common ancestor ~52.79  
293 million years ago (Fig. 3B).

294

## 295 **Conclusion**

296 To our knowledge, this is the first report of a chromosome-level genome assembly of *C.*  
297 *heterophylla* using the third-generation sequencing technologies of Nanopore and Hi-C. *C.*  
298 *heterophylla* has 210.26 Mb of repetitive sequences, accounting for 56.71% of genomic  
299 sequences. A total of 25,389 high-quality protein-coding genes were annotated by integrating  
300 evidence from *de novo* prediction, homologous protein prediction, and transcriptome data.

301 Phylogenetic analysis showed that *Corylus* is closely related to *Ostrya*, and they diverged from  
302 their common ancestor approximately 52.79 Mya. This work provides valuable  
303 chromosome-level genomic data for studying loquat traits. The genomic data should promote  
304 research on the molecular mechanisms of hazelnut responses to environmental stress and  
305 provides a valuable resource for genome-assisted improvements in *Corylus* breeding.

306

### 307 **Additional Files**

308 Supplementary Figure S1: Genome survey analysis of *C. heterophylla* based on  $k$ -mer = 19.

309 Supplementary Figure S2: Fragment size distribution of Hi-C read pairs.

310 Supplementary Figure S3: Venn plot of predicted genes generated from *ab initio*, RNAseq, and  
311 homology methods.

312 Supplementary Table S1a: Summary of Illumina data for genome survey and genome polishing.

313 Supplementary Table S1b: Statistics of Nanopore long reads.

314 Supplementary Table S1c: Distribution of Nanopore long read lengths.

315 Supplementary Table S1d: Summary of pooled transcriptome data used for gene prediction.

316 Supplementary Table S1e: Summary of Hi-C data for error correction and chromosome  
317 construction.

318 Supplementary Table S2: Valid interaction pairs of Hi-C sequencing data.

319 Supplementary Table S3a: Completeness analysis based on the CEG database.

320 Supplementary Table S3b: Genome completeness assessment based on Illumina sequencing  
321 reads.

322 Supplementary Table S4a: Summary of gene predictions resulting from different evidence.

323 Supplementary Table S4b: Gene function annotated by different databases.

324 Supplementary Table S4c: Non-coding RNA identification.

325

### 326 **Abbreviations**

327 BLAST: Basic Local Alignment Search Tool; bp: base pairs; BUSCO: Benchmarking Universal  
328 Single-Copy Orthologs; BWA: Burrows-Wheeler Aligner; CEGMA: Core Eukaryotic Genes  
329 Mapping Approach; CTAB: Hexadecyltrimethylammonium Bromide; Gb: gigabase pairs;  
330 GeMoMa: Gene Model Mapper; GO: Gene Ontology; Hi-C: high-throughput chromosome

331 conformation capture; HiSeq: high-throughput sequencing; HMM: hidden Markov model; kb:  
332 kilobase pairs; KEGG: Kyoto Encyclopedia of Genes and Genomes; KOG: EuKaryotic  
333 Orthologous Groups; LG: linkage group; LTR: long terminal repeat; Mb: megabase pairs;  
334 miRNA: microRNA; MITE: miniature inverted-repeat transposable element; MUSCLE:  
335 MUltiple Sequence Comparison by Log-Expectation; Mya: million years ago; NCBI: National  
336 Center for Biotechnology Information; NR: non-redundant; PAML: Phylogenetic Analysis of  
337 Maximum-Likelihood; PASA: Program to Assemble Spliced Alignments; PCR: polymerase  
338 chain reaction; PE: paired-end; PhyML: Phylogeny Maximum Likelihood; RNA-seq: RNA  
339 sequencing; rRNA: ribosomal RNA; SAAS: Shanghai Academy of Agricultural Sciences;  
340 SNAP: Semi-HMM-based Nucleic Acid Parser; TIR: terminal inverted repeat; TrEMBL: a  
341 database of translated proteins from European Bioinformatics Institute; TRF: Tandem Repeat  
342 Finder; tRNA: transfer RNA.

343

#### 344 **Competing Interests**

345 The authors declare that they have no competing interests.

346

#### 347 **Funding**

348 This work was financed by the Special Investigation on Basic Resources of Science and  
349 Technology (Grant No. 2019FY100801\_03) and the Special Fund for Basic Scientific Research  
350 Business of Central Public Research Institutes of the Chinese Academy of Forestry, China  
351 (Grant No. RIF-12 and CAFYBB2017ZA004-9).

352

#### 353 **Authors' Contributions**

354 T.Z., Z.Y., W.M., Q.M., and L.W. designed and conceived the study; W.M., L.L., and G.X.  
355 helped to collect the samples; T.Z., Z.Y., L.L., Q.M., and L.W. performed the experiments; T.Z.,  
356 W.M., Z.Y., Q.M., X.C., and L.W. wrote and revised the manuscript. All authors read and  
357 approved the manuscript.

358

#### 359 **Availability of supporting data**

360 The genome sequence data have been deposited in NCBI under the accession



361 JADOBO000000000. Raw reads of Nanopore, WGS, Hi-C and RNAseq, and genome assembly  
362 sequences of the *C. heterophylla* genome have been deposited at the Nucleotide Sequence  
363 Archive and GenBank in NCBI under BioProject PRJNA655406 and BioSample Accessions of  
364 SAMN15734705 and SAMN15734794. The SRA Accessions are SRR12458330,  
365 SRR12458329, SRR12458328, SRR12458327. All supplementary figures and tables are  
366 provided in Additional Files. Additional supporting data, including annotations, RNA-seq data,  
367 and phylogenetic trees, are available in the GigaDB database [66].

368

### 369 **Acknowledgements**

370 We thank Changmian Ji from the Chinese Academy of Tropical Agricultural Sciences for  
371 assistance with bioinformatics analysis and discussion.

372

### 373 **References**

- 374 1. Zong JW, Zhao TT, Ma QH, et al. Assessment of genetic diversity and population genetic structure of  
375 *Corylus mandshurica* in china using SSR markers. PLoS One. 2015;10 9:e0137528.  
376 doi:10.1371/journal.pone.0137528.
- 377 2. Mehlenbacher SA. Hazelnuts. A guide to nut tree culture in north america. Northern Nut Growers  
378 Association, Inc; 2003.
- 379 3. Boccacci P, Beltramo C, Sandoval Prado MA, et al. In silico mining, characterization and cross-species  
380 transferability of EST-SSR markers for European hazelnut (*Corylus avellana* L.). Molecular Breeding.  
381 2015;35 1:21. doi:10.1007/s11032-015-0195-7.
- 382 4. Gürcan K, Mehlenbacher S, Botta R, et al. Development, characterization, segregation, and mapping of  
383 microsatellite markers for European hazelnut (*Corylus avellana* L.) from enriched genomic libraries and  
384 usefulness in genetic diversity studies. Tree Genetics & Genomes. 2010;6 4:513-31.
- 385 5. Zhang YH, Liu L, Liang WJ, et al. China fruit's monograph-chestnut and hazelnut. Beijing:China Forestry  
386 Publishing House; 2005.
- 387 6. Molnar TJ. *Corylus*. Wild crop relatives: Genomic and breeding resources. 1 ed. Forest Trees:  
388 Springer-Verlag Berlin Heidelberg; 2011.
- 389 7. Wang GX. Studies on the cultivation and utilization of *Corylus* resources in china ( I ) - *Corylus* germplasm  
390 resources. Forestry Science Research. 2018;31:105 -12.
- 391 8. Wang GX, Ma QH, Zhao TT, et al. Resources and production of hazelnut in china. Acta horticulturae. 2018;  
392 1226:59-64.
- 393 9. Mayjonade B, Gouzy J, Donnadiou C, et al. Extraction of high-molecular-weight genomic DNA for  
394 long-read sequencing of single molecules. Biotechniques. 2016;61 4:203-5. doi:10.2144/000114460.
- 395 10. Doyle J. A rapid DNA isolation procedure for small quantities of fresh leaf tissue. Phytochem Bull.  
396 1987;19.
- 397 11. Marçais G, Kingsford C. A fast, lock-free approach for efficient parallel counting of occurrences of *k*-mers.  
398 Bioinformatics. 2011;27 6:764-70. doi:10.1093/bioinformatics/btr011.

- 399 12. Loman NJ, Quinlan AR. Poretools: A toolkit for analyzing nanopore sequence data. *Bioinformatics*.  
400 2014;30 23:3399-401. doi:10.1093/bioinformatics/btu555.
- 401 13. Belton JM, McCord RP, Gibcus JH, et al. Hi-C: A comprehensive technique to capture the conformation of  
402 genomes. *Methods*. 2012;58 3:268-76. doi:10.1016/j.ymeth.2012.05.001.
- 403 14. Grob S, Schmid MW, Grossniklaus U. Hi-C analysis in arabidopsis identifies the KNOT, a structure with  
404 similarities to the flamenco locus of *Drosophila*. *Mol Cell*. 2014;55 5:678-93.  
405 doi:10.1016/j.molcel.2014.07.009.
- 406 15. Xie T, Zheng JF, Liu S, et al. *De novo* plant genome assembly based on chromatin interactions: A case  
407 study of *Arabidopsis thaliana*. *Mol Plant*. 2015;8 3:489-92. doi:10.1016/j.molp.2014.12.015.
- 408 16. Koren S, Walenz BP, Berlin K, et al. Canu: Scalable and accurate long-read assembly via adaptive k-mer  
409 weighting and repeat separation. *Genome Res*. 2017;27 5:722-36. doi:10.1101/gr.215087.116.
- 410 17. Ruan J, Li H. Fast and accurate long-read assembly with wtdbg2. *Nat Methods*. 2020;17 2:155-8.  
411 doi:10.1038/s41592-019-0669-3.
- 412 18. Vaser R, Sović I, Nagarajan N, et al. Fast and accurate *de novo* genome assembly from long uncorrected  
413 reads. *Genome Research*. 2017;27 5:737-46. doi:10.1101/gr.214270.116.
- 414 19. Walker BJ, Abeel T, Shea T, et al. Pilon: An integrated tool for comprehensive microbial variant detection  
415 and genome assembly improvement. *PLoS One*. 2014;9 11:e112963. doi:10.1371/journal.pone.0112963.
- 416 20. Li H, Durbin R. Fast and accurate short read alignment with burrows-wheeler transform. *Bioinformatics*.  
417 2009;25 14:1754-60. doi:10.1093/bioinformatics/btp324.
- 418 21. Burton JN, Adey A, Patwardhan RP, et al. Chromosome-scale scaffolding of *de novo* genome assemblies  
419 based on chromatin interactions. *Nat Biotechnol*. 2013;31 12:1119-25. doi:10.1038/nbt.2727.
- 420 22. Seppy M, Manni M, Zdobnov EM. BUSCO: Assessing genome assembly and annotation completeness.  
421 *Methods Mol Biol*. 2019;1962:227-45. doi:10.1007/978-1-4939-9173-0\_14.
- 422 23. Parra G, Bradnam K, Korf I. CEGMA: A pipeline to accurately annotate core genes in eukaryotic genomes.  
423 *Bioinformatics*. 2007;23 9:1061-7. doi:10.1093/bioinformatics/btm071.
- 424 24. Li H, Durbin R. Fast and accurate long-read alignment with Burrows-Wheeler transform. *Bioinformatics*.  
425 2010;26 5:589-95. doi:10.1093/bioinformatics/btp698.
- 426 25. Han Y, Wessler SR. MITE-Hunter: A program for discovering miniature inverted-repeat transposable  
427 elements from genomic sequences. *Nucleic acids research*. 2010;38 22:e199. doi:10.1093/nar/gkq862.
- 428 26. Xu Z, Wang H. LTR\_FINDER: An efficient tool for the prediction of full-length LTR retrotransposons.  
429 *Nucleic Acids Res*. 2007;35 Web Server issue:W265-8. doi:10.1093/nar/gkm286.
- 430 27. Price AL, Jones NC, Pevzner PA. *De novo* identification of repeat families in large genomes.  
431 *Bioinformatics*. 2005;21 Suppl 1:i351-8. doi:10.1093/bioinformatics/bti1018.
- 432 28. Edgar RC, Myers EW. PILER: Identification and classification of genomic repeats. *Bioinformatics*. 2005;21  
433 Suppl 1:i152-8. doi:10.1093/bioinformatics/bti1003.
- 434 29. Hoede C, Arnoux S, Moisset M, et al. PASTEC: An automatic transposable element classification tool.  
435 *PLoS One*. 2014;9 5:e91929. doi:10.1371/journal.pone.0091929.
- 436 30. Bao W, Kojima KK, Kohany O. Repbase update, a database of repetitive elements in eukaryotic genomes.  
437 *Mob DNA*. 2015;6:11. doi:10.1186/s13100-015-0041-9.
- 438 31. Tarailo-Graovac M, Chen N. Using RepeatMasker to identify repetitive elements in genomic sequences.  
439 *Curr Protoc Bioinformatics*. 2009;Chapter 4:Unit 4.10. doi:10.1002/0471250953.bi0410s25.
- 440 32. Stanke M, Morgenstern B. AUGUSTUS: A web server for gene prediction in eukaryotes that allows  
441 user-defined constraints. *Nucleic acids research*. 2005;33 Web Server issue:W465-7.  
442 doi:10.1093/nar/gki458.

- 443 33. Alioto T, Blanco E, Parra G, et al. Using geneid to identify genes. *Curr Protoc Bioinformatics*. 2018;64  
444 1:e56. doi:10.1002/cpbi.56.
- 445 34. Majoros WH, Pertea M, Salzberg SL. TigrScan and GlimmerHMM: Two open source *ab initio* eukaryotic  
446 gene-finders. *Bioinformatics*. 2004;20 16:2878-9. doi:10.1093/bioinformatics/bth315.
- 447 35. Burge C, Karlin S. Prediction of complete gene structures in human genomic DNA. *J Mol Biol*. 1997;268  
448 1:78-94. doi:10.1006/jmbi.1997.0951.
- 449 36. Korf I. Gene finding in novel genomes. *BMC Bioinformatics*. 2004;5:59. doi:10.1186/1471-2105-5-59.
- 450 37. Camacho C, Coulouris G, Avagyan V, et al. Blast+: Architecture and applications. *BMC Bioinformatics*.  
451 2009;10:421. doi:10.1186/1471-2105-10-421.
- 452 38. Keilwagen J, Wenk M, Erickson JL, et al. Using intron position conservation for homology-based gene  
453 prediction. *Nucleic acids research*. 2016;44 9:e89. doi:10.1093/nar/gkw092.
- 454 39. Kim D, Langmead B, Salzberg SL. Hisat: A fast spliced aligner with low memory requirements. *Nat*  
455 *Methods*. 2015;12 4:357-60. doi:10.1038/nmeth.3317.
- 456 40. Pertea M, Pertea GM, Antonescu CM, et al. Stringtie enables improved reconstruction of a transcriptome  
457 from RNA-seq reads. *Nat Biotechnol*. 2015;33 3:290-5. doi:10.1038/nbt.3122.
- 458 41. TransDecoder (find coding regions within transcripts). Version 5.5.0.  
459 <https://github.com/transdecoder/transdecoder>. Accessed 10 February 2020.
- 460 42. Tang S, Lomsadze A, Borodovsky M. Identification of protein coding regions in RNA transcripts. *Nucleic*  
461 *acids research*. 2015;43 12:e78. doi:10.1093/nar/gkv227.
- 462 43. Campbell MA, Haas BJ, Hamilton JP, et al. Comprehensive analysis of alternative splicing in rice and  
463 comparative analyses with arabidopsis. *BMC Genomics*. 2006;7:327. doi:10.1186/1471-2164-7-327.
- 464 44. Haas BJ, Salzberg SL, Zhu W, et al. Automated eukaryotic gene structure annotation using  
465 EVIDENCEModeler and the program to assemble spliced alignments. *Genome Biol*. 2008;9 1:R7.  
466 doi:10.1186/gb-2008-9-1-r7.
- 467 45. Deng YY, Li JQ, Wu SF, et al. Integrated NR database in protein annotation system and its localization.  
468 *Computer Engineering*. 2006;32 5:71-2.
- 469 46. Koonin EV, Fedorova ND, Jackson JD, et al. A comprehensive evolutionary classification of proteins  
470 encoded in complete eukaryotic genomes. *Genome Biol*. 2004;5 2:R7. doi:10.1186/gb-2004-5-2-r7.
- 471 47. Boeckmann B, Bairoch A, Apweiler R, et al. The SWISS-PROT protein knowledgebase and its supplement  
472 TrEMBL in 2003. *Nucleic acids research*. 2003;31 1:365-70. doi:10.1093/nar/gkg095.
- 473 48. Kanehisa M, Furumichi M, Tanabe M, et al. KEGG: New perspectives on genomes, pathways, diseases and  
474 drugs. *Nucleic acids research*. 2017;45 D1:D353-d61. doi:10.1093/nar/gkw1092.
- 475 49. Zdobnov EM, Apweiler R. InterProScan--an integration platform for the signature-recognition methods in  
476 interPro. *Bioinformatics*. 2001;17 9:847-8. doi:10.1093/bioinformatics/17.9.847.
- 477 50. Conesa A, Götz S. Blast2GO: A comprehensive suite for functional analysis in plant genomics. *Int J Plant*  
478 *Genomics*. 2008;2008:619832. doi:10.1155/2008/619832.
- 479 51. Götz S, García-Gómez JM, Terol J, et al. High-throughput functional annotation and data mining with the  
480 Blast2GO suite. *Nucleic acids research*. 2008;36 10:3420-35. doi:10.1093/nar/gkn176.
- 481 52. She R, Chu JS, Wang K, et al. GenBlastA: Enabling BLAST to identify homologous gene sequences.  
482 *Genome Res*. 2009;19 1:143-9. doi:10.1101/gr.082081.108.
- 483 53. Birney E, Durbin R. Using GeneWise in the *Drosophila* annotation experiment. *Genome Res*. 2000;10  
484 4:547-8. doi:10.1101/gr.10.4.547.
- 485 54. Lowe TM, Eddy SR. tRNAscan-SE: A program for improved detection of transfer RNA genes in genomic  
486 sequence. *Nucleic acids research*. 1997;25 5:955-64. doi:10.1093/nar/25.5.955.

- 487 55. Kozomara A, Birgaoanu M, Griffiths-Jones S. miRBase: From microRNA sequences to function. *Nucleic*  
488 *acids research*. 2019;47 D1:D155-d62. doi:10.1093/nar/gky1141.
- 489 56. Friedländer MR, Mackowiak SD, Li N, et al. miRDeep2 accurately identifies known and hundreds of novel  
490 microRNA genes in seven animal clades. *Nucleic acids research*. 2012;40 1:37-52. doi:10.1093/nar/gkr688.
- 491 57. Nawrocki EP, Eddy SR. Infernal 1.1: 100-fold faster rna homology searches. *Bioinformatics*. 2013;29  
492 22:2933-5. doi:10.1093/bioinformatics/btt509.
- 493 58. Nawrocki EP, Burge SW, Bateman A, et al. Rfam 12.0: Updates to the RNA families database. *Nucleic*  
494 *acids research*. 2015;43 Database issue:D130-7. doi:10.1093/nar/gku1063.
- 495 59. Li L, Stoeckert CJ, Jr., Roos DS. OrthoMCL: Identification of ortholog groups for eukaryotic genomes.  
496 *Genome Res*. 2003;13 9:2178-89. doi:10.1101/gr.1224503.
- 497 60. Edgar RC. MUSCLE: Multiple sequence alignment with high accuracy and high throughput. *Nucleic acids*  
498 *research*. 2004;32 5:1792-7. doi:10.1093/nar/gkh340.
- 499 61. Talavera G, Castresana J. Improvement of phylogenies after removing divergent and ambiguously aligned  
500 blocks from protein sequence alignments. *Syst Biol*. 2007;56 4:564-77. doi:10.1080/10635150701472164.
- 501 62. Guindon S, Dufayard JF, Lefort V, et al. New algorithms and methods to estimate maximum-likelihood  
502 phylogenies: Assessing the performance of phylml 3.0. *Syst Biol*. 2010;59 3:307-21.  
503 doi:10.1093/sysbio/syq010.
- 504 63. Yang Z. PAML 4: Phylogenetic analysis by maximum likelihood. *Mol Biol Evol*. 2007;24 8:1586-91.  
505 doi:10.1093/molbev/msm088.
- 506 64. Takhtajan AL. Outline of the classification of flowering plants (*Magnoliophyta*). *Botanical Review*.  
507 1980;46 3:225-359.
- 508 65. Timetree database. <http://www.Timetree.Org/>. Accessed 10 February 2020.
- 509 66. Zhao T, Ma W, Yang Z, et al. Supporting data for "A chromosome-level reference genome of the hazelnut,  
510 *Corylus heterophylla* Fisch." *GigaScience Database* 2021. <http://doi.org/10.5524/100877>

1

2

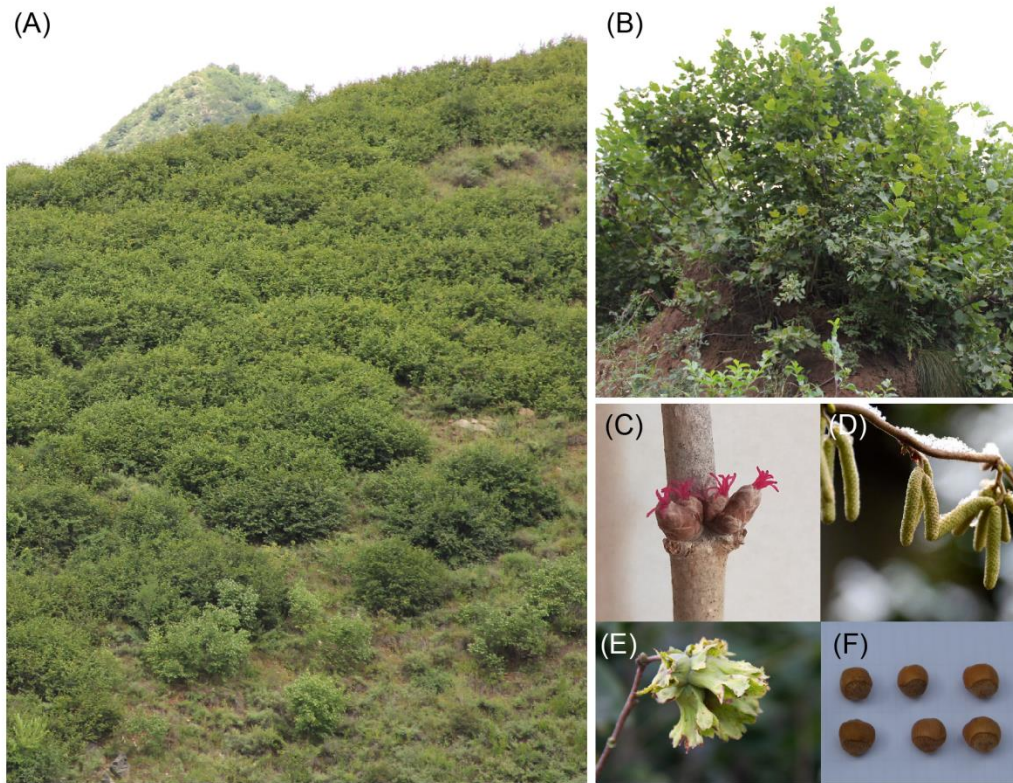

3

4 Figure1: Morphological characters of the Asian hazelnut variety, *C. heterophylla*.

5 Mature plants in panel (A) and (B), female inflorescence (C), staminate inflorescence

6 (D), fruit with husk (E), and nuts (F) are shown.

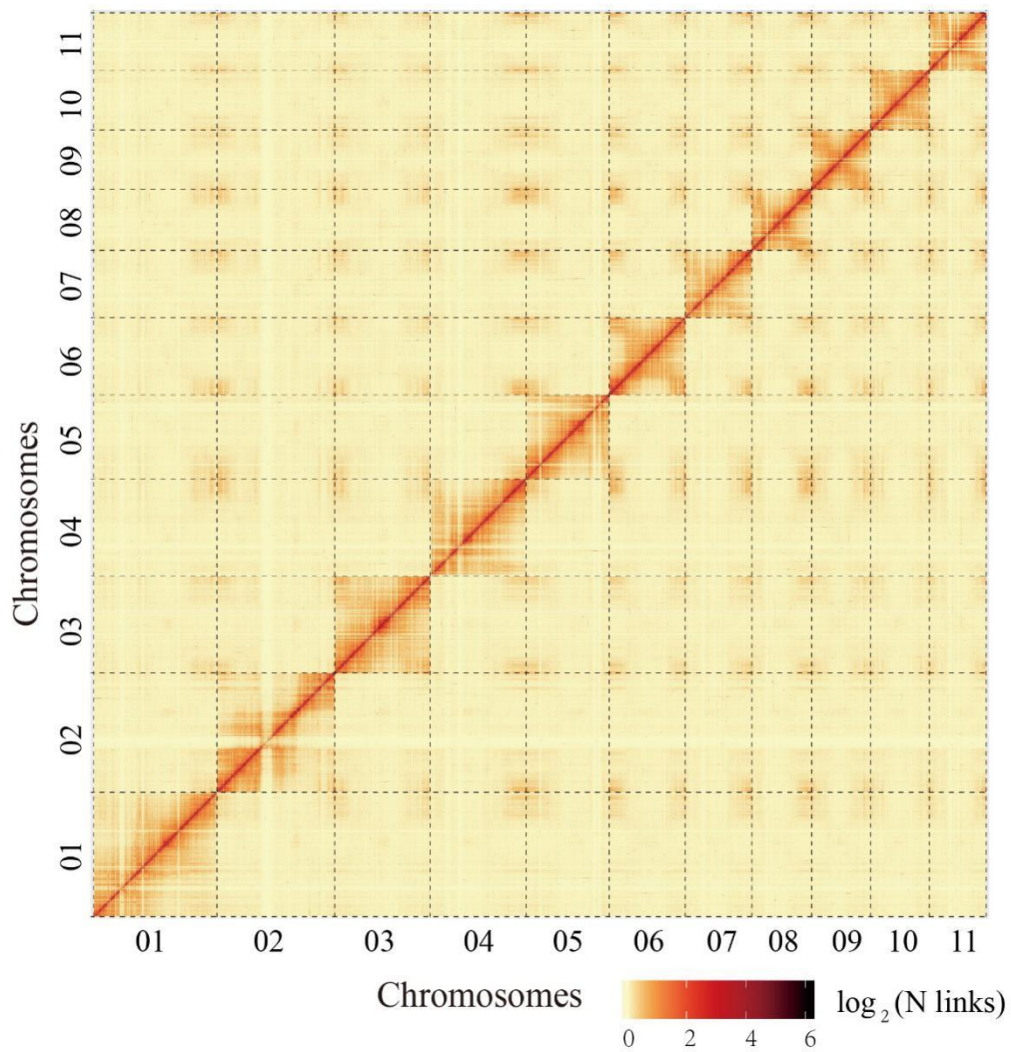

7

8 Figure2: Interaction frequency distribution of Hi-C links among eleven chromosomes.

9 Genome-wide Hi-C map of *C. heterophylla*. We scanned the genome by 500-kb

10 nonoverlapping window as a bin and calculated valid interaction links of Hi-C data

11 between any pair of bins. The  $\log_2$  of link number was transformed. The color key of

12 heatmap ranging from light yellow to dark red represented the frequency of Hi-C

13 interaction links from low to high (0~6).



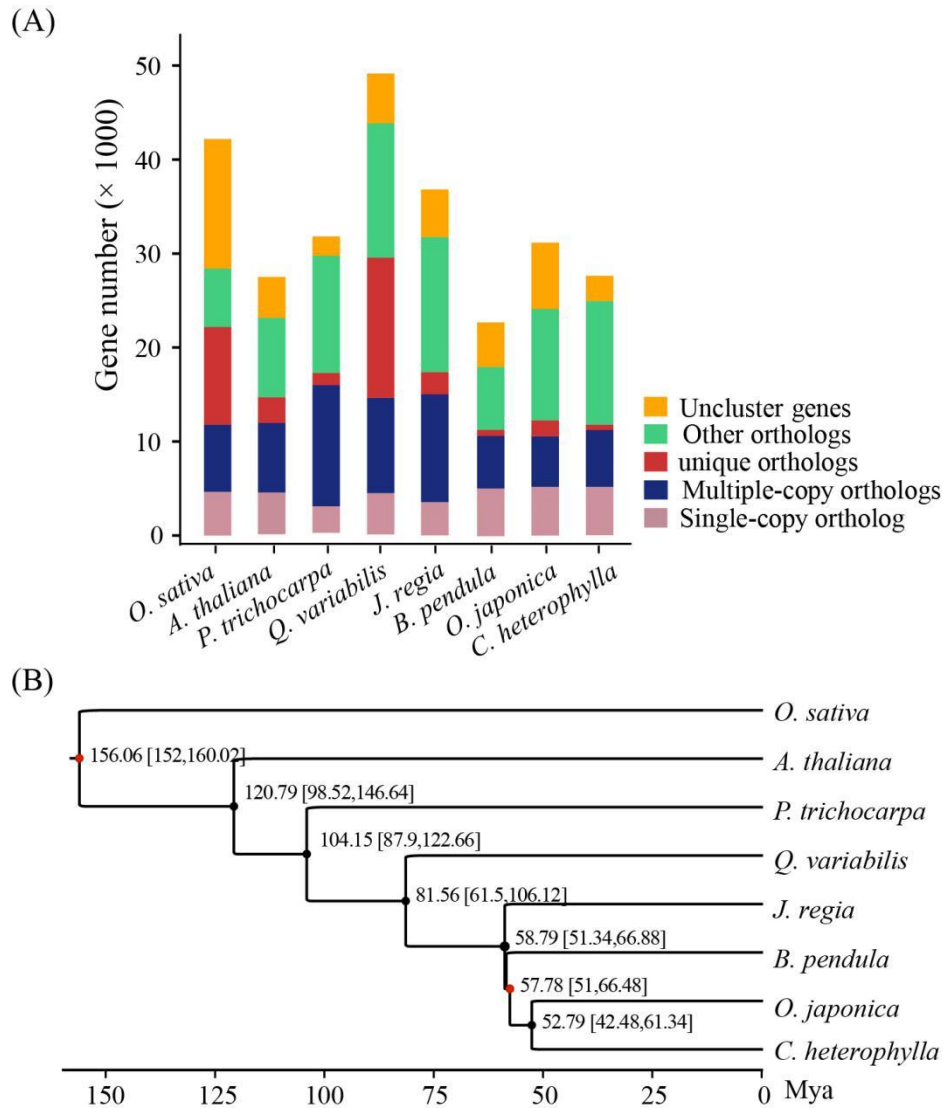

14

15 Figure3: Genome evolution analysis of *C. heterophylla*. (A) Summary of gene family  
 16 clustering of *C. heterophylla* and 7 related species. Single-copy ortholog, one copy  
 17 genes in ortholog group. Multiple-copy orthologs, multiple genes in ortholog group.  
 18 Unique orthologs, species-specific genes. Other orthologs, the rest of the clustered  
 19 genes. Uncluster genes, number of genes out of cluster. (B) Phylogenetic relationship  
 20 and divergence time estimation (MYA, millions of years ago). The *O. sativa* was  
 21 considered as outgroup in phylogenetic tree construction. The red dots indicate the  
 22 fossil correction time of *O. sativa* vs *P. trichocarpa* (152 - 160 Mya) and crown nodes  
 23 of family Betulaceae (51.2 - 66.7 Mya), respectively.

24

25 Table 1. Statistics of assembly results of *C. heterophylla* genome.

| Feature                      | <i>C. heterophylla</i> |
|------------------------------|------------------------|
| Genome size (bp)             | 370,750,808            |
| Contig number                | 1,328                  |
| Maximum contig length (bp)   | 9,680,353              |
| Contig N50 (bp)              | 2,068,510              |
| Contig L50                   | 48                     |
| Contig N90 (bp)              | 125,301                |
| Scaffold number              | 951                    |
| Maximum scaffold length (bp) | 46,514,939             |
| Scaffold N50 (bp)            | 31,328,411             |
| Scaffold L50                 | 5                      |
| Scaffold N90 (bp)            | 21,561,575             |
| GC content (%)               | 35.84                  |
| Gene number                  | 27,591                 |
| Gene length (bp)             | 123,431,253            |
| Average gene length (bp)     | 4,473.61               |
| Exon number                  | 138,886                |
| Exon length (bp)             | 33,679,425             |
| Intron number                | 138,885                |
| Intron length (bp)           | 89,751,828             |
| Pseudogenes                  | 2,988                  |
| Pseudogene length (bp)       | 7,166,319              |

26 Note: only sequences whose length is more than 1 kb are considered.

27

Table 2. Summary of eleven pseudo-chromosomes for *C. heterophylla*.

| Chr       | No. of clustered sequences | Length of clustered sequences (bp) | No. of ordered sequences | Length of ordered sequences (bp) |
|-----------|----------------------------|------------------------------------|--------------------------|----------------------------------|
| LG01      | 114                        | 49,577,893                         | 56                       | 46,509,439                       |
| LG02      | 113                        | 48,019,691                         | 49                       | 44,425,769                       |
| LG03      | 67                         | 37,395,073                         | 33                       | 36,016,943                       |
| LG04      | 95                         | 38,562,170                         | 53                       | 36,392,613                       |
| LG05      | 85                         | 34,656,877                         | 37                       | 31,324,811                       |
| LG06      | 76                         | 31,263,564                         | 31                       | 28,814,739                       |
| LG07      | 103                        | 29,494,057                         | 36                       | 25,003,895                       |
| LG08      | 45                         | 23,716,498                         | 23                       | 22,749,571                       |
| LG09      | 41                         | 23,427,462                         | 17                       | 22,292,654                       |
| LG10      | 41                         | 23,093,417                         | 25                       | 22,249,747                       |
| LG11      | 53                         | 22,694,573                         | 28                       | 21,558,875                       |
| Total (%) | 833 (62.73)                | 361,901,275 (97.61)                | 388 (46.58)              | 337,339,056 (93.21)              |



28

29 Table 3. Genome completeness assessment by BUSCO.

| Categories                      | Number | Percent (%) |
|---------------------------------|--------|-------------|
| Complete BUSCOs                 | 1,346  | 93.47       |
| Complete and single-copy BUSCOs | 1,296  | 90.00       |
| Complete and duplicated BUSCOs  | 50     | 3.47        |
| Fragmented BUSCOs               | 17     | 1.18        |
| Missing BUSCOs                  | 77     | 5.35        |
| Total BUSCO groups searched     | 1,440  | 100.00      |

30

31 Table 4. Repetitive elements in the *C. heterophylla* genome.

| Classes            | Number  | Length (bp) | Percent (%) |
|--------------------|---------|-------------|-------------|
| ClassI             | 584,311 | 169,738,018 | 45.78       |
| ClassI/DIRS        | 18,638  | 7,059,337   | 1.9         |
| ClassI/LARD        | 303,288 | 76,033,830  | 20.51       |
| ClassI/LINE        | 60,182  | 18,890,786  | 5.1         |
| ClassI/LTR/Copia   | 101,158 | 38,719,023  | 10.44       |
| ClassI/LTR/Gypsy   | 83,300  | 41,302,761  | 11.14       |
| ClassI/LTR/Unknown | 1,953   | 1,080,718   | 0.29        |
| ClassI/PLE         | 5,600   | 4,125,513   | 1.11        |
| ClassI/SINE        | 5,344   | 1,058,985   | 0.29        |
| ClassI/TRIM        | 3,828   | 1,023,113   | 0.28        |
| ClassI/Unknown     | 1,020   | 244,561     | 0.07        |
| ClassII            | 77,407  | 24,382,510  | 6.58        |
| ClassII/Crypton    | 455     | 109,226     | 0.03        |
| ClassII/Helitron   | 27,254  | 8,348,317   | 2.25        |
| ClassII/MITE       | 1,112   | 194,088     | 0.05        |
| ClassII/Maverick   | 754     | 165,986     | 0.04        |
| ClassII/TIR        | 44,403  | 15,342,483  | 4.14        |
| ClassII/Unknown    | 3,429   | 459,116     | 0.12        |
| PotentialHostGene  | 46,369  | 9,994,181   | 2.7         |
| SSR                | 1,135   | 265,113     | 0.07        |
| Unknown            | 116,728 | 26,584,597  | 7.17        |
| Total              | 825,950 | 210,255,221 | 56.71       |

32 DIRS: dictyostelium intermediate repeat sequence; LARD: large retrotransposon

33 derivative; LINE: long interspersed nuclear element; LTR: long terminal repeat;

34 MITE: miniature inverted-repeat transposable element; PLE: Penelope-like element;

35 SINE: short interspersed nuclear element; SSR: simple sequence repeat; TIR: terminal

36 inverted repeat; TRIM: terminal-repeat retrotransposons in miniature.

37



Click here to access/download  
**Supplementary Material**  
Supplementary tables.xls



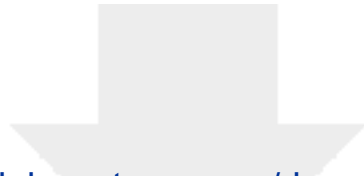

Click here to access/download  
**Supplementary Material**  
Supplementary figures.docx

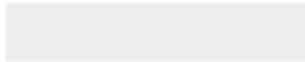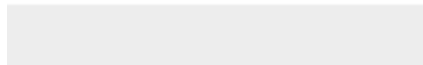

Supplement: giab027_giga-d-20-00312_revision_1.pdf [file giab027_giga-d-20-00312_revision_1.pdf]
