# Supplementary material for: A chromosome-level reference genome of the hazelnut, Corylus heterophylla Fisch
Source: PubMed Central journal article supplement (PMC8054262; doi:10.1093/gigascience/giab027), 2021-04-19
Supplement: giab027_reviewer_2_report_original_submission.pdf [file giab027_reviewer_2_report_original_submission.pdf]

## Reviewer Report

**Title:** A chromosome-level reference genome of the hazelnut, *Corylus heterophylla* Fisch.

**Version:** Original Submission    **Date:** 1/27/2021

**Reviewer name:** Jarkko Salojarvi, DSc (tech)

### Reviewer Comments to Author:

The authors present a chromosome-level assembly of hazelnut from a combination of short read, long read and Hi-C sequencing data. The assembly appears to be well done and the quality of the annotations is good.

The accession IDs for NCBI and SRA were still missing from this version, I would like to request that the data be deposited to the repository upon publication of the assembly.

The paper needs proof reading and help from a native English speaking person. There were several errors in grammar, in the beginning I kept track but when it became clear that the whole text is similar I stopped.

Abstract

Line 16: economically and ecologically important nut tree

Line 19: Nanopore (capital letter)

Line 29: bad english: molecular mechanism of hazelnut responding to environmental stress and serve as a resource ->

molecular mechanisms of how hazel nut responds to environmental stresses and serves as a resource (or similar)

35: provides

36: There is a high content

39 ranges (or varies between)

45: Inadequate

54: "one of the most economically wild *Corylus* species" - what does this mean?

85 Qbit -> Qubit

109: fuorometry -> fluorometry

253: this is the monocot - dicot split time

### Level of Interest

Please indicate how interesting you found the manuscript: Choose an item.

### Quality of Written English

Please indicate the quality of language in the manuscript: Choose an item.

## Declaration of Competing Interests

Please complete a declaration of competing interests, considering the following questions:

- Have you in the past five years received reimbursements, fees, funding, or salary from an organisation that may in any way gain or lose financially from the publication of this manuscript, either now or in the future?
- Do you hold any stocks or shares in an organisation that may in any way gain or lose financially from the publication of this manuscript, either now or in the future?
- Do you hold or are you currently applying for any patents relating to the content of the manuscript?
- Have you received reimbursements, fees, funding, or salary from an organization that holds or has applied for patents relating to the content of the manuscript?
- Do you have any other financial competing interests?
- Do you have any non-financial competing interests in relation to this paper?

If you can answer no to all of the above, write 'I declare that I have no competing interests' below. If your reply is yes to any, please give details below.

I declare that I have no competing interests

I agree to the open peer review policy of the journal. I understand that my name will be included on my report to the authors and, if the manuscript is accepted for publication, my named report including any attachments I upload will be posted on the website along with the authors' responses. I agree for my report to be made available under an Open Access Creative Commons CC-BY license (<http://creativecommons.org/licenses/by/4.0/>). I understand that any comments which I do not wish to be included in my named report can be included as confidential comments to the editors, which will not be published.

Choose an item.

To further support our reviewers, we have joined with Publons, where you can gain additional credit to further highlight your hard work (see: <https://publons.com/journal/530/gigascience>). On publication of this paper, your review will be automatically added to Publons, you can then choose whether or not to claim your Publons credit. I understand this statement.

Yes Choose an item.
